1 ***Toxoplasma* GRA15 and GRA24 are important activators of the host innate**  
2 **immune response in the absence of TLR11**

3

4 **Debanjan Mukhopadhyay<sup>1</sup>, David Arranz-Solís<sup>1</sup>, Jeroen P.J. Saeij<sup>1\*</sup>**

5

6 <sup>1</sup>Department of Pathology, Microbiology and Immunology, University of California Davis,  
7 Davis, California, United States of America

8

9 **Running title:** GRA15 and GRA24 activate the immune response in TLR11-deficient  
10 hosts

11

12 **Key words:** GRA15, GRA24, NFκB, p38 MAPK, TLR11, *Toxoplasma*,  
13 *Toxoplasmosis*

14

15 **Abstract**

16 The murine innate immune response against *Toxoplasma gondii* is predominated by the  
17 interaction of TLR11/12 with *Toxoplasma* profilin. However, mice lacking *Tlr11* or  
18 humans, who do not have functional TLR11 or TLR12, still elicit a strong innate immune  
19 response upon *Toxoplasma* infection. The parasite factors that determine this immune  
20 response are largely unknown. Herein, we investigated two dense granule proteins  
21 (GRAs) secreted by *Toxoplasma*, GRA15 and GRA24, for their role in stimulating the  
22 innate immune response in *Tlr11*<sup>-/-</sup> mice and in human cells, which naturally lack  
23 TLR11/TLR12. Our results show that GRA15 and GRA24 synergistically shape the early

24 immune response and parasite virulence in *Tlr11*<sup>-/-</sup> mice, with GRA15 as the  
25 predominant effector. Nevertheless, acute virulence in *Tlr11*<sup>-/-</sup> mice is still dominated by  
26 allelic combinations of *ROP18* and *ROP5*, which are effectors that determine evasion of  
27 the immunity-related GTPases. In human macrophages, GRA15 and GRA24 play a  
28 major role in the induction of IL12, IL18 and IL1 $\beta$  secretion. We further show that  
29 GRA15/GRA24-mediated IL12, IL18 and IL1 $\beta$  secretion activates IFN $\gamma$  secretion by  
30 peripheral blood mononuclear cells (PBMCs), which controls *Toxoplasma* proliferation.  
31 Taken together, our study demonstrates the important role of GRA15 and GRA24 in  
32 activating the innate immune response in hosts lacking TLR11.

33

#### 34 **Importance**

35 In mice, the early immune response against *Toxoplasma* is dominated by TLR11-  
36 mediated release of IL-12, which subsequently induces protective IFN $\gamma$ . Here we show  
37 that in *Tlr11*<sup>-/-</sup> mice and in human cells, which do not have TLR11, the *Toxoplasma*  
38 GRA15 and GRA24 effectors play an important role in induction of IL12, IL18 and IL1 $\beta$ ,  
39 and thus in the subsequent protective IFN $\gamma$  secretion.

40

#### 41 **Introduction**

42

43 *Toxoplasma gondii* is an obligate intracellular parasite capable of infecting any  
44 nucleated cell of any warm-blooded animal, including humans. It can cause lifelong  
45 persistent infections by forming semi-dormant cysts in muscles and the brain (1–3).

46 *Toxoplasma* resides within a non-fusogenic vacuole called the parasitophorous vacuole

47 (PV), which is separated from the host cell cytosol by the PV membrane (PVM),  
48 preventing the parasite from being recognized by the host innate immune system.  
49 However, the cytokine interferon-gamma (IFN $\gamma$ ) activates effector mechanisms that can  
50 mediate the elimination of *Toxoplasma*. Inflammatory cytokines produced by  
51 macrophages and dendritic cells (DCs) in response to Toll-like receptor (TLR)  
52 recognition of conserved pathogen associated molecular patterns (PAMPs) are  
53 important for subsequent production of IFN $\gamma$ . For example, in mice the *Toxoplasma*  
54 actin-binding protein profilin is recognized by a heterodimer of TLR11/12 that is located  
55 in the endosome, inducing a signaling cascade leading to the production of interleukin  
56 (IL)12 by DCs (4–6). IL12 in turn activates Natural Killer (NK) and T cells to secrete  
57 IFN $\gamma$ , which can trigger a variety of toxoplasmaicidal mechanisms (7, 8). In mice, IFN $\gamma$ -  
58 induced immunity related GTPases (IRGs) that can coat and vesiculate the PVM, and  
59 ultimately destroy the parasite inside, play a dominant role in resistance to *Toxoplasma*  
60 (9–11).

61 Innate immunity can also be activated by specific cytosolic receptors (often  
62 nucleotide-binding domain and leucine-rich repeat-containing receptors or NLRs) as a  
63 part of a multi-protein complex called the inflammasome (12). In mice, *Toxoplasma* can  
64 activate the NLRP1 and NLRP3 inflammasomes (13), leading to IL1 $\beta$ /IL18 production,  
65 which together with IL12 can enhance IFN $\gamma$  secretion and thereby contribute to host  
66 resistance against *Toxoplasma* (14, 15). However, inflammasome activation in *Tlr11*<sup>-/-</sup>  
67 mice can also induce a pathological inflammatory response (16).

68 Human sensing and killing of *Toxoplasma* differs from mice, as humans lack  
69 functional TLR11/12 and do not have IRGs (17). It was recently shown that the alarmin

70 S100A11 secreted from infected monocytes or fibroblasts can shape the human  
71 immune response through secretion of the chemokine ligand 2 (CCL2) (18). In addition,  
72 cytosolic recognition of *Toxoplasma* in human monocytes was shown to partly rely on  
73 the NLRP1 and NLRP3 inflammasome, resulting in secretion of IL1 $\beta$  (19, 20).  
74 Furthermore, guanylate binding protein (GBP)1 facilitates disruption of the PV in IFN $\gamma$ -  
75 stimulated human macrophages, which causes release of parasite nucleic acids that  
76 can activate cytosolic absent in melanoma 2 (AIM2) and caspase 8-dependent  
77 apoptosis (21). This could be another potential route of immune activation as  
78 recognition of cytosolic nucleic acids induces the type I interferon pathway.

79 *Toxoplasma* can counteract the host immune response by secreting effector  
80 proteins, ROPs and GRAs, into the host cell from specialized secretory organelles  
81 called rhoptries and dense granules, respectively (22, 23). In Europe and North  
82 America, strains belonging to four different *Toxoplasma* clonal lineages (types I, II, III  
83 and XII) are commonly isolated in animals and humans, although most infections are  
84 caused by type II strains (24–26). In mice, strain differences in virulence and modulation  
85 of host cell signaling are largely due to polymorphisms in ROPs and GRAs. For  
86 example, ROP18 (a secreted kinase) and ROP5 (a pseudokinase) determine strain  
87 differences in virulence in mice by cooperatively blocking the IFN $\gamma$ -induced IRGs (10,  
88 27–29). Several GRA proteins are localized on the PVM and can modulate the host  
89 immune response (30–32). For instance, GRA15 from type II strains activates the NF $\kappa$ B  
90 pathway, leading to macrophage production of inflammatory cytokines such as IL12 and  
91 IL1 $\beta$  (31, 33). Other GRAs are secreted beyond the PVM, where they can modulate  
92 host cell signaling pathways (22, 34–36). For example, GRA24 binds to p38 $\alpha$  MAPK

93 leading to its autophosphorylation and constitutive activation (35). Together, GRA15  
94 and GRA24 drive the classical activation of macrophages (M1) via the activation of  
95 NF $\kappa$ B and p38 MAPK (35, 37, 38). By contrast, the polymorphic kinase ROP16 from  
96 type I and type III strains drives the alternative activation of macrophages (M2) via the  
97 phosphorylation of the STAT6 and STAT3 transcription factors (37, 39, 40). It is likely  
98 that the deliberate activation of the immune response by *Toxoplasma* effectors is a  
99 strategy to limit its virulence thereby promoting the survival of its host and the formation  
100 of tissue cysts, which are the only stages in the intermediate host that are orally  
101 infectious.

102         Given the large impact of GRA15 and GRA24 on macrophage gene expression  
103 and production of IL12 and IL1 $\beta$ , it seems surprising that their *in vivo* effect on parasite  
104 virulence is relatively minor (31, 35). Mice infected with type II  $\Delta gra15$  or  $\Delta gra24$   
105 parasites had elevated parasite numbers early after infection, but as the infection  
106 progressed, parasite burden and host susceptibility were no different from those  
107 following wild-type type II strain infections (31, 35, 41). Increased type II  $\Delta gra15$  early  
108 parasite burdens were associated with decreased IL12 and IFN $\gamma$  levels 2 days after  
109 infection (31). Similar results were obtained after infection of mice with the  $\Delta gra24$  strain  
110 (35). Possibly, the effects of GRA15 and GRA24 in these studies were masked by  
111 profilin: as the infection progresses and parasites lyse out of host cells, PAMPS, such  
112 as profilin, are released and activate TLR11/12. At this stage, IL12/IL1 $\beta$  and subsequent  
113 IFN $\gamma$  production are probably no longer dependent on GRA15 and GRA24. However,  
114 humans and many animals do not have functional TLR11/12 or IFN $\gamma$ -inducible IRGs  
115 (17), and therefore *Toxoplasma* virulence of a particular strain in mice might not

116 correlate with virulence in other species. In *Tlr11*<sup>-/-</sup> mice, neutrophils are the main  
117 producers of IFN $\gamma$  with a minor role of NK and T cells (42). The production of IFN $\gamma$  by  
118 neutrophils is dependent on IL1 $\beta$  and TNF $\alpha$ , but not on IL12 (42). In addition, IL18  
119 secreted upon inflammasome activation plays a key role in the IFN $\gamma$  response from  
120 CD4<sup>+</sup> T cells and the subsequent disease outcome in *Tlr11*<sup>-/-</sup> mice (43). Thus, GRA15  
121 and GRA24, by inducing IL1 $\beta$ , IL18, TNF $\alpha$  and IL12, might play an important role in the  
122 production of IFN $\gamma$  in hosts lacking TLR11. Herein, we tested this hypothesis by  
123 infecting *Tlr11*<sup>-/-</sup> mice with wild-type,  $\Delta$ *gra15*,  $\Delta$ *gra24* and  $\Delta$ *gra15/24* parasites. Our data  
124 indicate that although parasites that do not express GRA15 and/or GRA24 induced  
125 significantly less inflammatory cytokines, a significant increase in virulence compared to  
126 wild-type was only observed after subcutaneous infection, likely because *Tlr11*<sup>-/-</sup> mice  
127 were already extremely susceptible to wild-type *Toxoplasma* infections. We further  
128 show that in *Tlr11*<sup>-/-</sup> mice IRG-mediated killing of *Toxoplasma* is likely still the major  
129 mechanism of resistance, as parasites that express avirulent ROP5 and ROP18 were  
130 completely avirulent in these mice. In human THP1-derived macrophages and PBMCs,  
131 GRA15 and GRA24 determined the induction of inflammatory cytokines and thereby  
132 had a large effect on parasite proliferation. Thus, in the absence of TLR11, GRA15 and  
133 GRA24 are the major parasite effectors that activate the innate immune response and it  
134 is likely that in humans they determine parasite virulence.

135

## 136 **Results**

137

### 138 **GRA15 and GRA24 regulate murine macrophage function *in vitro***

139 Synthesis of IL12 by *Toxoplasma*-infected macrophages was previously shown to be  
140 dependent on p38 MAPK and NF $\kappa$ B activation (44, 45). Indeed, deletion of either  
141 *GRA15* or *GRA24* significantly reduced macrophage IL12/IL23p40 production,  
142 consistent with their activation of the NF $\kappa$ B and p38 MAPK pathway, respectively (31,  
143 35). It was previously shown that *GRA24* from both type I RH and type II Pru strains  
144 activates the p38 MAPK pathway. However, the *GRA24*-dependent transcriptional  
145 changes in murine macrophages are much more pronounced after infection with type II  
146 strains compared to type I strains (35). For example, without *GRA24* the Pru induction  
147 of inflammatory cytokines, including IL12/IL23p40, is significantly affected, while *GRA24*  
148 only has a minor effect on the modulation of these cytokines by RH. It is possible that  
149 many of the *GRA24*-mediated transcriptional changes are dependent on *GRA15*, as RH  
150 does not express a functional *GRA15* (31). To more directly test whether *GRA15* and  
151 *GRA24* have any synergistic or additive effect on macrophages, we generated *gra24*  
152 single knockout and *gra15/gra24* double knockout parasites in the type II Pru strain  
153 (**Suppl. Fig. 1**). We infected murine bone marrow derived macrophages (BMDMs) with  
154 Pru wild-type,  $\Delta$ *gra15* (31),  $\Delta$ *gra24* and  $\Delta$ *gra15/24* parasites for 24 h and measured the  
155 release of IL12/IL23p40, IL1 $\beta$  and TNF $\alpha$ , which are cytokines often used as M1  
156 macrophage polarization markers (38). BMDMs infected with  $\Delta$ *gra15* or  $\Delta$ *gra15/24*  
157 parasites secreted significantly less IL12/IL23p40, IL1 $\beta$  and TNF $\alpha$  (**Fig. 1a-c**) compared  
158 to wild-type infected BMDMs. Deletion of *GRA24* significantly impaired the release of  
159 IL12/IL23p40 but had no effect on IL1 $\beta$  and TNF $\alpha$  (**Fig. 1a-c**). We also measured  
160 arginase activity (a marker for M2 macrophages) in macrophages infected with  $\Delta$ *gra15*,  
161  $\Delta$ *gra24* or  $\Delta$ *gra15/24* parasites.  $\Delta$ *gra24* and  $\Delta$ *gra15/24*, but not wild-type and  $\Delta$ *gra15*

162 parasites, induced significant arginase activity in macrophages (**Fig. 1d**). The  
163 transcription of the p40 subunit of IL12 in mice is primarily dependent on cREL and  
164 moderately on the NFκB p65 subunit (46). Macrophages infected with wild-type  
165 parasites contained significantly more nuclear (activated) cREL compared to  
166 macrophages infected with  $\Delta gra15$ ,  $\Delta gra24$  or  $\Delta gra15/24$  parasites (**Fig. 1e**). Similar  
167 results were obtained in human foreskin fibroblasts (HFFs) (**Suppl. Fig. 3**). Nuclear  
168 translocation of the NFκB p65 subunit in macrophages and HFFs was significantly  
169 reduced after infection with  $\Delta gra15$  or  $\Delta gra15/24$  parasites but not after infection with  
170  $\Delta gra24$  parasites (**Suppl. Fig 1e and f**). Thus, our results show that while GRA15 is  
171 required for the secretion of IL1β and TNFα from BMDM, both GRA15 and GRA24 are  
172 required for the secretion of IL12/IL23p40.

### 173 **Deletion of *GRA15* and *GRA24* affects *in vivo* parasite growth and cytokine** 174 **production in *Tlr11*<sup>-/-</sup> mice**

175 It was previously shown that the intraperitoneal parasite load in C57BL/6 mice  
176 intraperitoneally (i.p.) infected with either  $\Delta gra15$  or  $\Delta gra24$  was higher compared to  
177 wild-type parasites, but the mortality of the mice was not significantly different (31, 35).  
178 To determine if *Toxoplasma* profilin-mediated activation of TLR11 might have masked  
179 the effect of GRA15 and GRA24 we investigated parasite burden and mortality in the  
180 *Tlr11*<sup>-/-</sup> mice. *Tlr11*<sup>-/-</sup> mice i.p. infected with  $\Delta gra15$ ,  $\Delta gra24$  or  $\Delta gra15/24$  parasites had  
181 a significantly larger peritoneal parasite load 3 days p.i. compared to wild-type infected  
182 mice, with  $\Delta gra15$ -infected mice having the highest parasite load (**Fig. 2a**). On day 1  
183 p.i., the level of IL12/IL23p40, IFNγ, IL1β or TNFα in the serum was not higher than in  
184 uninfected mice (not shown). It was recently shown that in *Tlr11*<sup>-/-</sup> mice IL18 is



185 necessary and sufficient for induction of IFN $\gamma$  production (43). The IL18 level was  
186 significantly increased in mice infected with wild-type parasites (**Fig. 2b**) while mice  
187 infected with  $\Delta gra15$  or  $\Delta gra24$  parasites had significantly lower serum IL18 levels on  
188 day 1 p.i. compared to wild-type parasite infected mice, which was even further reduced  
189 in mice infected with  $\Delta gra15/24$  parasites. On day 1 p.i. IFN $\gamma$ , IL18, IL1 $\beta$  or TNF $\alpha$  were  
190 not detected in the peritoneal fluid (not shown) but the IL12/IL23p40 levels were  
191 significantly higher in mice infected with wild-type parasite compared to uninfected mice  
192 (**Suppl. Fig. 4a**). Mice infected with  $\Delta gra15/24$  parasites contained significantly lower  
193 IL12/IL23p40 levels compared to wild-type parasite infected mice (**Suppl. Fig. 4a**). On  
194 day 3 p.i., the IL18 level in serum still remained significantly higher in wild-type parasite  
195 infected mice, while  $\Delta gra15$ ,  $\Delta gra24$  or  $\Delta gra15/24$  parasites elicited significantly lower  
196 IL18 levels (**Fig. 2c**). Although IL12/IL23p40 levels were significantly lower at day 3 p.i.  
197 in sera of mice infected with  $\Delta gra15/24$  parasites compared to wild-type infected mice  
198 (**Fig. 2d**), this difference was not detected in the peritoneal fluid (**Fig. 2f**). On day 3 p.i.,  
199 there was a large increase in IFN $\gamma$  in both serum and peritoneal fluid of wild-type  
200 parasite infected mice (**Fig. 2e and g**) which was significantly decreased in mice  
201 infected with  $\Delta gra15$  and  $\Delta gra24$  parasites, and even further decreased in mice infected  
202 with  $\Delta gra15/24$  parasites (**Fig. 2e and g**). All  $Tlr11^{-/-}$  mice i.p. infected with wild-type or  
203  $\Delta gra15/24$  parasites died by day 10 p.i. with similar severe reduction in body weight  
204 (**Suppl. Fig. 4b and c**). Thus, GRA15 and GRA24 both contribute to induction of IFN $\gamma$   
205 from  $Tlr11^{-/-}$  mice by inducing IL18 and IL12, which impacts the early intraperitoneal  
206 parasite load.

207 It was previously described that *Tlr11*<sup>-/-</sup> mice can survive i.p. infection with tissue cysts  
208 (20-25 cysts) (5, 6, 42). In our hands, however, all *Tlr11*<sup>-/-</sup> mice i.p. infected with 10  
209 cysts of wild-type or  $\Delta$ *gra15/24* parasites succumbed by day 13 p.i. with similar body  
210 weight reduction, although the  $\Delta$ *gra15/24* parasites caused significantly earlier mortality  
211 (**Suppl. Fig. 4d and e**). Because of the unexpected extreme susceptibility of the *Tlr11*<sup>-/-</sup>  
212 mice after i.p. infection with tachyzoites or with tissue cysts, we performed s.c. infections  
213 to curb rapid *Toxoplasma* dissemination. Compared to wild-type,  $\Delta$ *gra15/24* parasites  
214 caused significantly more mortality in s.c. infected *Tlr11*<sup>-/-</sup> mice (**Fig. 2h**), whereas  
215  $\Delta$ *gra15* and  $\Delta$ *gra15/24* parasites caused a significantly larger body weight reduction  
216 (**Fig. 2i**). Thus, GRA15 and GRA24 have a significant effect on the innate immune  
217 response in *Tlr11*<sup>-/-</sup> mice. However, these mice are already extremely susceptible to  
218 wild-type parasite infection and an increased virulence of parasites without GRA15  
219 and/or GRA24 can therefore not be detected after i.p. infection.

## 220 **The *ROP18* and *ROP5* allelic combinations determines survival of *Tlr11*<sup>-/-</sup> mice**

221 Although there was a significant difference in cytokine induction in *Tlr11*<sup>-/-</sup> mice i.p.  
222 infected with  $\Delta$ *gra15*,  $\Delta$ *gra24* or  $\Delta$ *gra15/24* parasites (**Fig. 2b-g**), all mice succumbed  
223 within 10-13 days p.i. In mice, acute parasite virulence is determined by the exact  
224 *ROP18* and *ROP5* allele (10, 47–50). To determine the role of *ROP18* and *ROP5* in  
225 *Tlr11*<sup>-/-</sup> mice we i.p. infected *Tlr11*<sup>-/-</sup> mice with 4 F1 progeny (S22, S26, STE10 and  
226 CL13) from a type IIxIII cross (51) that have the avirulent alleles of *ROP18* and *ROP5*.  
227 While 100% mortality was observed after infection with 100 Pru wild-type or  $\Delta$ *gra15/24*  
228 parasites (**Suppl. Fig. 4b**), mice infected with these F1 progeny strains survived doses  
229 up to 10<sup>5</sup> parasites (**Fig. 2h and i**). Only 1 mouse infected with CL13 and 2 mice

230 infected with STE10 parasites (out of 5) died at the  $10^7$  dose (**Fig. 2j**), accompanied  
231 with significant body weight reduction (7-10%) only in mice infected with the STE10  
232 strain (**Suppl. Fig. 4f-h**). Thus, although in *Tlr11*<sup>-/-</sup> mice the cytokine response is  
233 significantly influenced by GRA15 and GRA24, survival after i.p. infection is almost  
234 entirely dependent on ROP18 and ROP5. It therefore appears that *Tlr11*<sup>-/-</sup> mice are not  
235 a good model for the human immune response to *Toxoplasma* as humans do not have  
236 IRGs and ROP18 and ROP5 do not affect *Toxoplasma* resistance to IFN $\gamma$  in human  
237 cells (10, 17, 52).

### 238 **GRA15 and GRA24 induce cytokine secretion in human macrophages through** 239 **activation of p38 MAPK and NF $\kappa$ B**

240 The innate immune response against *Toxoplasma* in human monocytes is affected by  
241 the infecting strain type. For example, type II, but not type I strains, are major inducers  
242 of IL1 $\beta$  (18, 33), which is primarily dependent on type II GRA15 (33). However, the role  
243 of GRA24 in the induction of pro-inflammatory cytokines by human macrophages is not  
244 known. We measured IL12/IL23p40, IL1 $\beta$  and TNF $\alpha$  from THP1-derived macrophages  
245 infected with wild-type,  $\Delta$ *gra15*,  $\Delta$ *gra24* and  $\Delta$ *gra15/24* parasites and observed that,  
246 akin to murine macrophages, GRA15 and GRA24 were both important for generation of  
247 IL12/IL23p40 (**Fig. 3a**). However, in contrast to murine macrophages, both GRA15 and  
248 GRA24 determined IL1 $\beta$  and TNF $\alpha$  production by THP1-derived macrophages (**Fig. 3b-**  
249 **c**). This difference between human and murine macrophages could be due to species-  
250 specific transcription factor dependence as often seen specifically for macrophages  
251 (53). We also measured the growth of the different parasite lines in THP1 macrophages  
252 and detected a growth advantage in parasites lacking *GRA24* compared to wild-type

253 parasites (**Fig. 3d**). Furthermore, similar to murine macrophages, while GRA15 and  
254 GRA24 specifically activated nuclear translocation of p65 NF $\kappa$ B and p38 MAPK,  
255 respectively, in THP1 macrophages (**Fig. 3e and f, Suppl. Fig. 5a-b**), both GRA15 and  
256 GRA24 were required for nuclear translocation of cREL (**Fig. 3g and Suppl. Fig. 5c**).  
257 To confirm the role of NF $\kappa$ B and p38 MAPK on cytokine secretion from THP1  
258 macrophages, we inhibited the two pathways using BAY11-7082, an irreversible  
259 inhibitor of I $\kappa$ B phosphorylation important for NF $\kappa$ B activation (54) and BIRB796, a  
260 potent inhibitor of p38 MAPK $\alpha$  (55), respectively. Inhibition of either the NF $\kappa$ B or p38  
261 MAPK pathway significantly inhibited the secretion of IL12/IL23p40 and IL1 $\beta$  from THP1  
262 macrophages infected with wild-type parasites (**Fig. 3h and i**), while the inhibitors did  
263 not affect parasite growth (**Fig. 3j**). Thus, GRA15 and GRA24 regulate pro-inflammatory  
264 cytokine production from THP1-derived macrophages through NF $\kappa$ B- and p38 MAPK-  
265 dependent pathways.

### 266 **IL12 and NLRP3 inflammasome-derived IL18 induce the secretion of IFN $\gamma$ from** 267 **human PBMCs**

268 In mice, IFN $\gamma$  is known to be induced by IL12, which can be further enhanced by IL18  
269 and IL1 $\beta$  (14, 15). To determine the role of IL12 and IL18 in the induction of IFN $\gamma$  in  
270 human cells we used PBMCs as a model (56). When PBMCs were infected with Pru  
271 wild-type there was a significant decrease in IFN $\gamma$  secretion upon blocking IL12 or IL18  
272 compared to either untreated or isotype antibody-treated cells (**Fig. 4a**), which was  
273 more pronounced when cells were treated with blocking antibodies against both IL12  
274 and IL18. These results suggest that both IL12 and IL18 are required for optimal IFN $\gamma$   
275 production by human PBMC (**Fig. 4a**). This was further corroborated by the increased

276 parasite growth detected in PBMCs treated with blocking antibodies against IL12, IL18,  
277 or both (**Fig. 4b**). IL18 and IL1 $\beta$  are secreted as a result of inflammasome activation  
278 (12). In *Toxoplasma*-infected human PBMCs, IL1 $\beta$  secretion is mediated via NLRP3  
279 inflammasome activation (20). Indeed, inhibition of the NLRP3 inflammasome with  
280 MCC950 or inhibition of CASP1 with VX765 led to a significant decrease in IL1 $\beta$ , IL18,  
281 and IFN $\gamma$  secretion (**Fig. 4c-e**) accompanied by increased parasite growth (**Fig. 4g**).  
282 These effects on IFN $\gamma$  by the inhibitors were not dependent on IL12/IL23p40 secretion,  
283 as the inhibitors did not alter IL12/IL23p40 levels (**Fig. 4f**). Thus, IFN $\gamma$  secretion from  
284 human PBMCs infected with the type II Pru strain, is dependent on IL12 and NLRP3  
285 inflammasome-derived IL18 and IL1 $\beta$ .

#### 286 **Cytokine secretion from human PBMCs is mediated through activation of NF $\kappa$ B** 287 **and p38 MAPK by GRA15 and GRA24**

288 To test whether p38 MAPK and NF $\kappa$ B signaling are involved in cytokine production from  
289 PBMCs infected with Pru wild-type, we used the inhibitors BIRB796 (inhibits p38 MAPK)  
290 and BAY11-7082 (inhibits I $\kappa$ B phosphorylation). Both inhibitors inhibited secretion of  
291 IL12/IL23p40 (**Fig. 5a**), IL1 $\beta$  (**Fig. 5b**) and IFN $\gamma$  (**Fig. 5c**), with BAY11-7082 having a  
292 much greater effect (**Fig. 5a-c**). Furthermore, compared to untreated PBMCs, those  
293 treated with either of these inhibitors supported more parasite growth (**Fig. 5d**). As we  
294 observed that GRA15 and GRA24 induced inflammatory cytokine generation in THP1-  
295 derived macrophages, we also tested their effect on human PBMCs. PBMCs infected  
296 with  $\Delta gra15$ ,  $\Delta gra24$ , or  $\Delta gra15/gra24$  parasites secreted significantly less IL12/IL23p40  
297 compared to PBMCs infected with wild-type parasites (**Fig. 6a**). Furthermore, parasites  
298 lacking *GRA15*, *GRA24*, or both grew more in PBMCs compared to wild type parasites

299 probably due to lack of anti-parasitic IFN $\gamma$  secretion from PBMCs infected with the  
300 knockout parasites (**Suppl. Fig. 6a**). Likewise, PBMCs infected with  $\Delta gra15$ ,  $\Delta gra24$ , or  
301  $\Delta gra15/gra24$  parasites secreted significantly less IFN $\gamma$ , TNF $\alpha$  and IL1 $\beta$  compared to  
302 PBMCs infected with wild-type (**Fig. 6b-d**). Thus, GRA15 and GRA24 together  
303 determine the secretion of proinflammatory cytokines IL12/23p40, IFN $\gamma$ , TNF $\alpha$  and IL1 $\beta$   
304 from infected human PBMCs.

305 Recently, it was shown that in humans, alarmin S100A11 is released from *Toxoplasma*-  
306 infected fibroblasts and sensed by THP1 monocytes, which upregulated CCL2  
307 production to induce recruitment of additional monocytes (18). However, the secretion  
308 of alarmin S100A11 did not differ between uninfected and parasite infected PBMCs  
309 (**Suppl. Fig. 6b**). Nevertheless, akin to a previous study (18), HFFs infected with wild-  
310 type parasites secreted significantly more S100A11 compared to uninfected cells, which  
311 could be due to increased activity of inflammatory caspases 1 and 4 (**Suppl. Fig. 6c-d**).  
312 Secretion of S100A11 is dependent on permeabilization mediated cell lysis (18) and  
313 fibroblasts treated with Triton X100 released very high level of S100A11 (**Suppl. Fig.**  
314 **6b**). HFFs infected with type II strains underwent significant cell death possibly  
315 explaining the increase in S100A11 release (data not shown). Our data indicate that  
316 inflammatory cytokine secretion from human PBMCs infected with type II *Toxoplasma* is  
317 regulated by both GRA15 and GRA24.

## 318 **Discussion**

319 Innate recognition of *Toxoplasma gondii* DNA/RNA and profilin by nucleic acid sensing  
320 TLRs or TLR11/12 heterodimers is critical for robust IL12 production and subsequent  
321 activation of host protective IFN $\gamma$  (7, 57, 58). Nevertheless, hosts lacking TLR11/12 can

322 still produce IL12 from monocytes and dendritic cells while IFN $\gamma$  is produced from T  
323 cells, NK cells and neutrophils (18, 42, 43, 56). Our study showed that, compared to  
324 wild-type parasite infected mice, *Tlr11*<sup>-/-</sup> mice infected with parasites lacking *GRA15*  
325 and/or *GRA24* have an increased parasite load which was correlated with significantly  
326 lower IL18, IL12 and IFN $\gamma$  levels. However, even in the *Tlr11*<sup>-/-</sup> mouse model, parasite  
327 virulence is primarily determined by ROP18 and ROP5. ROP18 and ROP5 counteract  
328 the IRGs, which are not present in humans, and which likely explains why ROP18 and  
329 ROP5 do not determine parasite susceptibility to human IFN $\gamma$  (10, 17, 52). Thus *Tlr11*<sup>-/-</sup>  
330 mice do not appear to be a good model for the human immune response to  
331 *Toxoplasma*. We show that in human THP1 derived macrophages *GRA15* and *GRA24*  
332 induced IL12, TNF $\alpha$  and IL1 $\beta$  through their ability to activate the NF $\kappa$ B and p38 MAPK  
333 pathways. In PBMCs we show that IFN $\gamma$  secretion is dependent on IL12 and NLRP3  
334 inflammasome-derived IL18 and IL1 $\beta$ , which are also induced by *GRA15* and *GRA24*.  
335 Thus, *GRA15* and *GRA24* are major activators of the human immune response.

336 In the murine model of toxoplasmosis, IL12 production is largely dependent on dendritic  
337 cells (DCs) and macrophages (4, 44, 59, 60). However, the mechanism of IL12  
338 production by these two cell types is different (8), as in DCs it is primarily determined by  
339 TLR11, chemokine receptor 5 (CCR5) and the myeloid differentiation factor 88 (MyD88)  
340 pathway, with an additional role of G protein coupled receptor signaling (GPCR) (4, 61,  
341 62). On the other hand, generation of IL12 from macrophages is independent of TLR11  
342 and is induced primarily by cREL NF $\kappa$ B driven transcription (8, 63). Additionally,  
343 compared to cREL NF $\kappa$ B, p65 NF $\kappa$ B plays a moderate role in induction of IL12/IL23p40  
344 (46). The larger impact on IL12/IL23p40 production by *GRA15* compared to *GRA24*

345 might be due to the activation of both p65 and cREL by GRA15, while GRA24 only  
346 activates cREL. TNF $\alpha$  and IL1 $\beta$  are regulated by the NF $\kappa$ B p65-p50 subunit in murine  
347 macrophages (46) which explains why these cytokines were not affected by GRA24.

348 Compared to an *in vitro* cell culture system, the immune response *in vivo* is much more  
349 complex, as multiple cell types interact and can exert a considerable influence on  
350 disease outcome. For instance, although *Tlr11*<sup>-/-</sup> mice lack the increased level of IL12  
351 compared to wild-type mice upon *Toxoplasma* infection (4, 5, 57) the IFN $\gamma$  response in  
352 these mice is intact and even higher than in wild-type mice, possibly due to the higher  
353 parasite load (42, 43, 57). One important gap in these studies is the determination of  
354 what parasitic factors are responsible for the residual IL12 or IL18 that activate NK and  
355 T cells to produce IFN $\gamma$ . Although, GRA15 and GRA24 control cytokine induction in  
356 *Tlr11*<sup>-/-</sup> mice, a significant level of IFN $\gamma$  was still detected in *Tlr11*<sup>-/-</sup> mice infected with  
357  $\Delta$ *gra15/24* parasites. This is probably due to the release of parasite derived nucleic  
358 acids after IRG and GBP-mediated destruction of the PVM, which can induce interferon  
359 production through nucleic acid sensing TLRs (57, 64). Mice lacking either *Tlr11*<sup>-/-</sup> or  
360 *Tlr3/7/9*<sup>-/-</sup> still produce IL12 and IFN $\gamma$  upon *Toxoplasma* infection, whereas in 3d mice  
361 (lacking the endosomal chaperone UNC93B1 for all TLR 3/7/9/11/12) or *Tlr3/7/9/11*<sup>-/-</sup>  
362 quadruple knockout mice, the IL12 and IFN $\gamma$  response was completely abrogated (57).

363 This could explain why a significant level of IFN $\gamma$  in *Tlr11*<sup>-/-</sup> mice infected with  $\Delta$ *gra15/24*  
364 parasites was still detected.

365 It was previously shown that *Tlr11*<sup>-/-</sup> mice infected with ME49 tissue cysts were not more  
366 susceptible compared to wild-type mice (42, 57). By contrast, in our study acute  
367 susceptibility of *Tlr11*<sup>-/-</sup> mice was observed when infected with either a low number of



368 Pru cysts or tachyzoites which was accompanied by a steady reduction of body weights.  
369 Similarly, a recent study showed an increased susceptibility of *Tlr11*<sup>-/-</sup> mice after ME49  
370 infection (43). This variable susceptibility of *Tlr11*<sup>-/-</sup> mice could be due to the parasite  
371 strains used for infection, i.e ME49 *versus* Pru, which can elicit a different immune  
372 response (65). Alternatively, the different susceptibility of *Tlr11*<sup>-/-</sup> mice could be  
373 explained by variations in the microbiota in these mice, as they were housed in different  
374 colonies (5, 42, 43, 57, 66)(43). Acute mortality of mice upon *Toxoplasma* infection  
375 depends on the route of infection and virulence of the parasite strain (67). For virulent  
376 parasites a difference between knockout and wild-type parasites is more likely to be  
377 detected after s.c. infections, as this results in a slower dissemination of parasites from  
378 the site of infection (32). Similarly, in our study significantly enhanced virulence of  
379  $\Delta$ *gra15/24* parasites compared to Pru wild type was only observed after s.c. infection.

380 The human immune response to *Toxoplasma* has been studied in THP1 monocytes  
381 (18, 33), isolated PBMCs (18), or elutriated monocytes (18, 20, 56). Previous studies  
382 have shown that although THP1 monocytes infected with type II strains secrete IL1 $\beta$   
383 (18, 33), they do not secrete IL12/IL23p40 (18). However, we observed that PMA-  
384 differentiated THP1 macrophages secreted both IL12/IL23p40 and IL1 $\beta$  in a GRA15-  
385 and GRA24-dependent way. This could be attributed to differences between monocytes  
386 used in those studies (18, 33) versus macrophages in our study as primary human  
387 monocytes and macrophages from the same donor differ in their cytokine secretion  
388 pattern (20, 56). In the present work, we detected a large amount of IL12/IL23p40  
389 secretion from *Toxoplasma* infected PBMCs. This is in accordance with Tosh *et al.* (56),  
390 where they showed that elutriated monocytes or column purified monocytes were

391 equally efficient in secreting IL12/IL23p40 secretion upon *Toxoplasma* infection  
392 regardless of the strain type. On the other hand, Safronova et al. (18) did not observe  
393 any IL12/IL23p40 secretion from PBMCs infected with type II *Toxoplasma*. This  
394 discrepancy could be due to differences in the isolation and purification of monocytes,  
395 time point of the assay and, most importantly, the multiplicity of infection (MOI) (68).

396 THP1 cells are a homogenous monocytic cell population, whereas human PBMCs  
397 contain a mixture of cell types comprising a small proportion (approx. 10%) of  
398 monocytes (69). T cells constitute the largest fraction of PBMCs (roughly  $\frac{3}{4}$  th), and  
399 IFN $\gamma$  production by these cells is primarily determined by IL12 and IL18-mediated  
400 activation of STAT4, p38 MAPK, NF $\kappa$ B, and activator protein 1 (AP-1) family of  
401 transcription factors, respectively (70). It has been shown that within human PBMCs  
402 *Toxoplasma* preferentially infects monocytes but lymphocytes were also infected at a  
403 lower level (71, 72). Based on these facts and the results observed in our study, we  
404 hypothesize that in human PBMCs the parasite-infected monocytes produce IL12  
405 through cREL activation and IL18 by inflammasome activation (73), which together  
406 activate T cells to produce anti-parasitic IFN $\gamma$  which could destroy some PVs.

407 Subsequently, PAMPs get released inside the host cytosol and could be sensed by  
408 cytosolic nucleic acid sensing TLRs such as TLR3/7/9, in turn inducing IL12. Indeed, it  
409 has been shown that IFN $\gamma$ -primed human PBMCs produce IL12, IL1 $\beta$  and TNF $\alpha$  when  
410 treated with type II parasite derived DNA and RNA (57). Taken together, we determined  
411 that the immune response against *Toxoplasma* in TLR11 deficient mice or human cells  
412 is largely dependent on GRA15/GRA24-induced inflammasome-mediated secretion of  
413 IL18/IL-1 $\beta$  which together with IL12 activate NK and T cells to secrete IFN $\gamma$  that kills the

414 parasite. Our study advances our understanding of the human immune response  
415 against *Toxoplasma*.

416

## 417 **Materials and Methods**

### 418 **Culture of cells and parasites**

419 Human foreskin fibroblasts (HFFs) and RAW 264.7 macrophages were cultured as  
420 described previously (31, 74). All parasite lines were maintained *in vitro* by serial  
421 passage on HFFs monolayers and cultured in the same medium as HFFs but with 1%  
422 fetal bovine serum FBS). A *Toxoplasma gondii* Pru strain expressing firefly luciferase  
423 and GFP (Pru $\Delta$ *hpt*, PruA7) was used as representative of type II (75).

### 424 **Generation of bone marrow-derived macrophages and THP1 macrophages**

425 Bone marrow-derived macrophages (BMDMs) were isolated from C57BL/6 mice and  
426 cultured as described previously (13). THP1 monocytes were cultured in RPMI-1640  
427 supplemented with 10% FBS, 2 mM L-glutamine, 100 U/mL penicillin/streptomycin and  
428 10 mg/mL gentamicin. For differentiation into macrophages, THP1 monocytes were  
429 stimulated with 100 nM phorbol 12-myristate 13-acetate (PMA) for 3 days and then  
430 rested for 1 day with replacement of the PMA containing medium with complete medium  
431 without PMA before performing experiments. All the experiments involving THP1  
432 monocytes were performed with passage numbers <10.

### 433 **Generation of knockout parasites**

434 It was previously shown that type II *Toxoplasma* strains lacking hypoxanthine-guanine  
435 phosphoribosyltransferase (*HXGPRT* or *HPT*) are more virulent than strains having  
436 *HPT* (76). To remove the *HPT* gene from the  $\Delta$ *gra15* strain, we mutated the *HPT* locus  
437 (TGME49\_200320) by using a clustered regularly interspaced short palindromic repeat  
438 (CRISPR)-Cas9 based system. The sgRNA sequence against *HPT* (**Table 1**) was  
439 cloned into the pSS013-Cas9 vector (pU6 plasmid, Addgene plasmid # 52694) using  
440 the *BsaI* specific sites. To generate Pru $\Delta$ *gra15* $\Delta$ *hpt*, the circular pSS013-Cas9 vector  
441 containing the sgRNA against *HPT* was transfected (10  $\mu$ g) as described elsewhere  
442 (77). For the selection of  $\Delta$ *hpt* parasites, single clones were grown in parallel with  
443 Mycophenolic acid (MPA)-Xanthine (25  $\mu$ g/mL) and 6-Thioxanthine (177  $\mu$ g/mL)  
444 containing media. Parasites that were able to grow in 6-Thioxanthine but not in MPA-  
445 xanthine media were selected and further confirmed by PCR and sequencing (**Table 1**).  
446 To disrupt *GRA24* (TgME49\_230180) in Pru $\Delta$ *hpt* and Pru $\Delta$ *hpt* $\Delta$ *gra15* strains, the  
447 pSS013-Cas9 vector containing a sgRNA against *GRA24* was transfected along with  
448 *NotI* (New England Biolabs) linearized pLoxP-DHFR-mCherry-LoxP (Addgene Plasmid  
449 #70147), at a 5:1 molar ratio, as described previously (77). This plasmid contains a  
450 pyrimethamine resistance cassette tagged with the fluorescence marker mCherry and  
451 flanked by two LoxP sites. After three rounds of pyrimethamine selection (1  $\mu$ M) and  
452 limiting dilution cloning, *GRA24* knockout parasites were assessed by PCR and  
453 confirmed by sequencing (**Table 1**). To flox out DHFR-mCherry,  $\Delta$ *gra24* and  $\Delta$ *gra15/24*  
454 parasites were transfected with a plasmid (78) expressing Cre recombinase (50  $\mu$ g) as  
455 described above. Single clones were checked for their inability to grow in the presence  
456 of pyrimethamine and absence of mCherry.

457 **Generation and maintenance of *Tlr11*<sup>-/-</sup> mice**

458 To generate the *Tlr11*<sup>-/-</sup> mouse colony, two 4-week-old *Tlr11*<sup>-/-</sup> male mice (42, 66) were  
459 bred with wild-type female C57BL/6 mice (Jackson laboratories). The *Tlr11*<sup>+/-</sup> F1  
460 progeny mice were subsequently crossed to obtain *Tlr11*<sup>-/-</sup> mice. Genotyping of F2  
461 individuals was performed by PCR from DNA isolated from tail clips to identify the  
462 hybrid or homozygous variants (**Table 2, Suppl. Fig. 2**). Once the homozygous mice  
463 were confirmed by PCR genotyping (**Suppl. Fig. 2**), they were bred to get the entire  
464 colony of *Tlr11*<sup>-/-</sup> mice. Mice were maintained at the University of California, Davis (UC  
465 Davis) mouse housing facility, where water and feed were provided *ad libitum*. Animal  
466 experiments were performed in strict accordance with the recommendations in the  
467 Guide for the Care and Use of Laboratory Animals of the National Institutes of Health  
468 and the Animal Welfare Act, approved by the Institutional Animal Care and Use  
469 Committee at UC Davis (assurance number A-3433-01).

470 ***In vivo* infection, parasite burden and cytokine measurement**

471 Male and female 6–10-week-old *Tlr11*<sup>-/-</sup> mice were used in the experiments. For  
472 infection, tachyzoites were cultured in HFFs and extracted from host cells by passage  
473 through 27- and 30-gauge needles, washed two times in PBS, and quantified with a  
474 hemocytometer. Parasites were diluted in PBS, and mice were inoculated either i.p. or  
475 s.c. with tachyzoites of each strain (100-5,000 tachyzoites in 200  $\mu$ l) using a 29-gauge  
476 needle. Body weights were recorded every day and for survival analysis mice were kept  
477 for 30 days. To obtain brain cysts, 5,000 tachyzoites of wild-type and  $\Delta$ *gra15/24*  
478 parasites were injected i.p. into CD1 mice (Charles River) and 4 weeks later these mice  
479 were sacrificed, brains aseptically collected and cysts isolated for both strains (41).

480 Subsequently, 10 cysts of each parasite strain were infected i.p. into *Tlr11*<sup>-/-</sup> mice to  
481 determine survival and body weight reduction.

482 *In vivo* parasite burden was measured by i.p. infecting 5,000 tachyzoites into *Tlr11*<sup>-/-</sup>  
483 mice for 3 days. Subsequently, peritoneal fluids were collected and cells isolated by  
484 centrifugation. A total of 1×10<sup>5</sup> cells were plated in 96-well plates in triplicate for each  
485 group for 24 h. Following incubation, supernatants were removed and lysis buffer was  
486 added prior to measure relative parasite growth by luciferase assay (74).

487 To quantify cytokines *in vivo*, mice were sacrificed on day 1 or 3 p.i. to collect blood and  
488 peritoneal fluid. Serum was diluted 1:10 for IL12/IL23p40 and 1:20 for IFN $\gamma$  and TNF $\alpha$   
489 measurement. IFN $\gamma$ , IL12/IL23p40, and TNF $\alpha$  levels were determined using  
490 commercially available matched pair ELISA kits (Invitrogen, Thermo Fisher Scientific),  
491 following the manufacturer's instructions.

#### 492 ***In vitro* parasite growth determination**

493 Freshly confluent HFFs 24-well plates were used to determine relative parasite growth  
494 by plaque assay. On the day of infection, the media was replaced and 250 freshly  
495 harvested parasites were added to each well. Plates were then left undisturbed for 6  
496 days at 37 °C 5% CO<sub>2</sub>, after which plaque areas were imaged and measured. Plaque  
497 areas were captured and analyzed using a Nikon TE2000 inverted microscope  
498 equipped with Hamamatsu ORCA-ER digital camera and NIS Elements Imaging  
499 Software, respectively. For all experiments, at least 20-25 plaques from technical  
500 duplicate wells were imaged. For measurement of total parasite growth, a luciferase-  
501 based assay was performed (74).

502 **Immunofluorescence detection of p65 (NFκB), p-p38 MAPK and c-REL (NFκB)**  
503 **nuclear translocation**

504 Immunofluorescence to detect nuclear translocation of p65 (NFκB), p-p38 MAPK and c-  
505 REL was done in HFFs, MEFs, RAW 264.7 macrophages and THP1-derived  
506 macrophages using the following antibodies: rabbit anti p65 (1:200 dilution, sc-109,  
507 Santacruz Biotechnology, CA, USA), rabbit anti p-p38 MAPK (1:800 dilution, #4511,  
508 Cell Signaling Technology, MA, USA), rabbit anti cREL (1:500 dilution, #4727, Cell  
509 Signaling Technology, MA, USA) and mouse anti cREL (1:200 dilution, NBP2-37593,  
510 Novus Biologicals, CO, USA for RAW 264.7 macrophages). Briefly, cells were plated on  
511 coverslips in 24-well plates ( $1 \times 10^5$  cells/well) and subsequently infected with  
512 *Toxoplasma* with a MOI of 3 for 24 h. Following incubation, cells were fixed with 3%  
513 formaldehyde, permeabilized and blocked with buffer containing 0.2% Triton X-100  
514 along with 3% BSA and 5% goat serum. Cells were incubated with primary antibodies  
515 overnight at 4 °C, after which each well was washed 3 times with 1×PBS, followed by  
516 incubation with goat anti rabbit Alexa fluor 594 (1:1,000 dilution, Invitrogen) and  
517 Hoechst 33258 (1:500 dilution, Invitrogen, Thermo Fisher Scientific) for 1 h. Finally,  
518 coverslips were washed 5 times with 1×PBS and mounted with VECTASHIELD antifade  
519 mounting medium (Vector Laboratories, CA, USA). Nuclear intensity of at least 15  
520 infected cells was measured for each experiment and coverslip.

521 **Isolation of human peripheral blood mononuclear cells (PBMCs)**

522 PBMCs were isolated from leukocyte reduction chambers (LRS) from individual donors,  
523 which were purchased from BloodSource (CA, USA) and tested seronegative for  
524 *Toxoplasma*. After collecting the blood from the LRS according to the manufacturer's

525 protocol using sterile needles and blades, PBMCs were isolated using ficoll-Paque  
526 premium 1.077 gm/dL (GE Healthcare, PA, USA) as described previously (79). Isolated  
527 PBMCs were subsequently used for experiments using RPMI-1640 supplemented with  
528 10% FBS, 2 mM L-glutamine, 100 U/mL penicillin/streptomycin and 10 mg/mL  
529 gentamicin or kept frozen in 90% FBS and 10% dimethyl sulfoxide (DMSO) for later  
530 use.

### 531 ***In vitro* cytokine ELISA**

532 C57BL/6 BMDMs, Raw 264.7 macrophages, THP1 macrophages or PBMCs were  
533 seeded ( $1 \times 10^5$  cells per well) in 96-well plates at 37 °C in 5% CO<sub>2</sub>. Cells were infected  
534 with freshly lysed tachyzoites of the different parasite strains at MOI = 3, 5 and 7, and  
535 supernatants (200 µl) were collected 24 h p.i. and used to determine IL12/IL23p40,  
536 IL1β, TNFα, IL18 and IFNγ levels. To verify that cells were infected with equal numbers  
537 of viable parasites, plaque assays were performed as described above. Cytokine levels  
538 were measured using a commercially available matched pair ELISA kit (Invitrogen,  
539 Thermo Fisher Scientific) following the manufacturer's instructions.

540 In some assays, THP1 cells or PBMCs were first treated 2 h prior to infection with  
541 different inhibitors: BAY 11-7082 at 5 µM, (APExBIO, TX, USA), BIRB796 at 10 µM  
542 (Tocris Bioscience, MN, USA), VX765 at 50 µM (Selleckchem, TX, USA) and MCC950  
543 at 10 µM (Adipogen Life Sciences, CA, USA), and culture supernatants collected after  
544 20 h. A total of 30 µL of cell lysis buffer was added per well and a luciferase-based  
545 growth assay was performed as mentioned above.



546 For IFN $\gamma$  determination in IL12 and/or IL18 neutralized conditions, PBMCs were first  
547 infected with Pru wild-type parasites and 1 h p.i. cells were treated with either 2  $\mu$ g/mL  
548 of IL12, IL18 or isotype specific antibodies (MBL International, Japan), or both IL12 and  
549 IL18 together for another 20 h before harvesting the culture supernatant. Parasite  
550 growth was measured by luciferase assay as described above.

#### 551 **Measurement of alarmin S100A11 by ELISA**

552 Alarmin S100A11 was measured by using a commercially available pre-coated kit from  
553 RayBiotech (GA, USA). Briefly, PBMCs ( $1 \times 10^5$  cells/well) or HFFs ( $2 \times 10^4$  cells/well)  
554 were seeded in 96-well plates at 37 °C in 5% CO $_2$  and subsequently infected with  
555 freshly lysed tachyzoites of the different parasite strains at MOI = 3, 5 and 7, and  
556 supernatants (100  $\mu$ l) were collected 24 h p.i. As a positive control for S100A11  
557 secretion, 2% Triton X-100 was used in complete medium. To compare the level of  
558 S100A11 secretion between different strains, parallel plaque assays were performed.

#### 559 **Arginase assay from macrophages**

560 Arginase activity was measured from lysates of RAW 264.7 macrophages infected with  
561 different strains of *Toxoplasma* 24 h p.i in a 96-well plate with three different MOIs each  
562 time as described previously (74). To determine that cells were infected with equal  
563 numbers of viable parasites, plaque assays were performed as described above and  
564 values relativized.

#### 565 **Caspase 1/4/5 activity assay**

566 Activity of the inflammatory caspases 1/4/5 was measured using a commercially  
567 available Caspase-Glo $^{\text{®}}$  1 Inflammasome Assay (Promega, WI, USA) from HFFs

568 seeded in 96-well plates ( $2 \times 10^4$  cells per well). HFFs were pre-treated with an inhibitor  
569 of caspases 1/4/5 (VX765 at 50  $\mu$ M) 2 h before infection and subsequently infected with  
570 Pru wild-type parasites for another 20 h. Caspase activity was measured from the lysate  
571 and data were recorded from a single channel luminometer with a 10 s delay program.

572

573

574

575

## 576 **Figure Legends**

### 577 **Figure 1: GRA15 and GRA24 activate the *in vitro* macrophage response**

578 BMDMs were infected with indicated *Toxoplasma* strains for 24 h and IL12/IL23p40 (a),  
579 IL1 $\beta$  (b) and TNF $\alpha$  (c) were measured in the supernatant. Experiments were done 3  
580 times. Arginase activity was measured (d) from RAW 264.7 macrophages infected with  
581 indicated strains 24 h p.i. Nuclear translocation of the cREL subunit of NF $\kappa$ B (e) was  
582 quantified from infected RAW 264.7 macrophages 18 h p.i. with indicated strains. In  
583 each experiment at least 15 cells were quantified as shown in the graph (left) and  
584 experiment was done 3 times (right panel graph). A representative image for each  
585 group is shown in the middle panel. Scale bar is 10  $\mu$ m. Each dot represents the mean  
586 of 3 technical replicates from individual experiments, except for the scatter diagram in  
587 (e). Statistical analysis was done by two sample student's t test for figures a-e. Data are  
588 represented as mean  $\pm$  standard error of the mean (SEM).

### 589 **Figure 2: Deletion of *GRA15* and *GRA24* leads to enhanced parasite virulence in**

#### 590 ***Tlr11*<sup>-/-</sup> mice**

591 *Tlr11*<sup>-/-</sup> mice were i.p. infected with 5,000 tachyzoites of indicated *Toxoplasma* strains  
592 expressing luciferase, and serum and peritoneal fluid were collected from each mouse  
593 (N=3 mice per group) at different time points. (a) Three days p.i. peritoneal cells were  
594 isolated, plated in tissue culture plates for 24 h and the following day luciferase reading  
595 was taken to measure the parasite burden. (b) Serum IL18 levels at 1 day p.i. Serum

596 IL18 (c), IL12/IL23p40 (d) and IFN $\gamma$  (e) levels 3 days p.i. IL12/IL23p40 (f) and IFN $\gamma$  (g)  
597 levels in the peritoneal fluid 3 days p.i. All data represent mean  $\pm$  SEM. Statistical  
598 analysis was done with two sample Student's t tests. *Tlr11*<sup>-/-</sup> mice were s.c. infected with  
599 5,000 tachyzoites of indicated strains and (h) survival and (i) weight (plotted as an  
600 average of the change in body weight for each cohort, where 100% body weight  
601 corresponds to the day of infection) of the mice were monitored for 30 days. Statistical  
602 analysis was done using a log-rank test. N=8 each for wild-type and  $\Delta$ *gra15/24* whereas  
603 N=5 for  $\Delta$ *gra15* and  $\Delta$ *gra24*. *Tlr11*<sup>-/-</sup> mice were i.p injected with indicated doses of  
604 tachyzoites of different *Toxoplasma* strains derived from F1 progenies of a type II X type  
605 III cross (51) containing avirulent *ROP18* and *ROP5* alleles and survival was monitored  
606 (j). Each dot represents a mean of 3 technical replicates from an experiment. Statistical  
607 analysis was done by two sample student's t test for figures a-g. Data are represented  
608 as mean  $\pm$  standard error of the mean (SEM).

609 **Figure 3: GRA15 and GRA24 activate pro-inflammatory cytokine secretion by**  
610 **human macrophages.**

611 THP1 monocyte-derived macrophages were infected with indicated *Toxoplasma* strains  
612 for 24 h, after which IL12/IL23p40 (a), IL1 $\beta$  (b) and TNF $\alpha$  were measured. Relative  
613 parasite growth was measured by luciferase growth assay (d). Nuclear translocation of  
614 the NF $\kappa$ B p65 (e), p-p38 MAPK (f), and NF $\kappa$ B cREL (g) subunits were quantified from  
615 infected THP1 macrophages 18 h p.i with indicated strains. In each experiment at least  
616 15 cells were quantified. THP1 macrophages were treated with indicated inhibitors 2 h  
617 prior to infection and subsequently infected for an additional 20 h. IL12/IL23p40 (h),  
618 IL1 $\beta$  (i) and growth (j) were measured. Each dot represents a technical mean value

619 from a single experiment, and each experiment was done 3 times. Statistical analysis  
620 was done by One way ANOVA followed with Tukey's multiple comparison test. Data are  
621 represented as mean  $\pm$  standard error of the mean (SEM).

622 **Figure 4: Secretion of IFN $\gamma$  from human PBMCs is dependent on IL12 and NLRP3**  
623 **inflammasome-derived IL18 and IL1 $\beta$**

624 PBMCs were infected with Pru wild-type parasites and treated with either anti-IL12, anti-  
625 IL18, isotype specific antibody, or anti-IL12+anti-IL18 1 h p.i. Supernatants were  
626 harvested for quantification of IFN $\gamma$  (**a**) and parasite growth (**b**). PBMCs were treated  
627 with the caspase 1/4 inhibitor VX765 or NLRP3 inhibitor MCC950 2 h pre-infection  
628 followed by infection for another 20 h. After harvesting the culture supernatant, IL1 $\beta$  (**c**),  
629 IL18 (**d**), IFN $\gamma$  (**e**) and IL12/IL23p40 (**f**) were measured. Parasite growth was measured  
630 from the cell lysate using luciferase assay (**g**). Each dot represents the mean of 3  
631 technical replicates from a single experiment. Statistical analysis was done with Two  
632 way ANOVA followed by Tukey's multiple comparison test (**a**), two sample Student's t  
633 test (**b and g**), and One way ANOVA followed by Tukey's multiple comparison test (**c-f**).  
634 Data are represented as mean  $\pm$  standard error of the mean (SEM).

635 **Figure 5: Cytokine secretion from human PBMCs is mediated by activation of**  
636 **NF $\kappa$ B and p38 MAPK**

637 PBMCs were treated with indicated inhibitors 2 h prior to infection and subsequently  
638 infected for 20 h, after which IL12/IL23p40 (**a**), IL1 $\beta$  (**b**) and IFN $\gamma$  were measured. The  
639 relative parasite growth was measured by luciferase growth assay (**d**). Each dot  
640 represents the mean of 3 technical replicates from an experiment. Statistical analysis

641 was done with One way ANOVA followed by Tukey's multiple comparison test. Data are  
642 represented as mean  $\pm$  standard error of the mean (SEM).

643 **Figure 6: GRA15 and GRA24 induce cytokine secretion by human PBMCs**

644 PBMCs were infected with indicated *Toxoplasma* strains for 24 h, after which  
645 IL12/IL23p40 (a), IFN $\gamma$  (b), TNF $\alpha$  (c), IL1 $\beta$  (d) were measured. Each dot represents the  
646 mean of 3 technical replicates from an experiment. Statistical analysis was done with  
647 One way ANOVA followed by Tukey's multiple comparison test. Data are represented  
648 as mean  $\pm$  standard error of the mean (SEM).

649 **Supplementary Figure 1: Generation of knockout strains**

650 Sequence of the Hypoxanthine-guanine phosphoribosyltransferase (*HPT*) gene showing  
651 the sgDNA sequence in red for Cas9-mediated disruption and primer sequence in  
652 yellow (a). Disruption of the *HPT* gene was determined by using specific primers  
653 designed to amplify the region shown in the bottom figure, while *GRA27* was used as a  
654 housekeeping PCR control (at the top) (b). Schematic diagram of the strategy followed  
655 to delete *GRA24* (top) and PCR to screen the clones confirming the disruption of the  
656 gene (P1+P2) (bottom) is shown in (c). wild-type (left) and the presence of the insertion  
657 of the repair template in the locus (P1+P3) (right). Identification of  $\Delta$ *gra24* and  
658  $\Delta$ *gra15/24* double knockout using specific primer sets for *GRA24* (top panel), *GRA15*  
659 (middle panel) and *GRA27* as a control for quality of the input DNA (lower panel) (d).  
660 Nuclear translocation of the p65 subunit of NF $\kappa$ B was quantified from infected RAW  
661 264.7 macrophages 18 h p.i. with indicated strains. At least 15 cells were quantified as  
662 shown in the graph (left) and representative images are shown on the right (e).

663 Phenotypic confirmation of single clones of wild-type,  $\Delta gra15$ ,  $\Delta gra24$  and  $\Delta gra15/24$   
664 parasites by their ability to activate NF $\kappa$ B (**f,g**) and p38 MAPK (**h**). Each dot represents  
665 the mean value of at least 15 host cell nuclei (**f and h**) or 3 technical replicates (**g**) from  
666 a single experiment. Statistical analysis was done by One way ANOVA followed by  
667 Tukey's multiple comparison test. Data are represented as mean  $\pm$  standard error of the  
668 mean (SEM).

### 669 **Supplementary Figure 2:**

670 Mouse breeding scheme to generate in house *TLR11* knockout mice by cross-breeding  
671 homozygous *Tlr11*<sup>-/-</sup> male with homozygous *Tlr11*<sup>+/+</sup> female mice (**a**). Primers in the  
672 TLR11 locus (top) and PCR of the F1 progeny (bottom) where the homozygous *Tlr11*<sup>+/+</sup>  
673 yields a single band around 700 bp, homozygous *Tlr11*<sup>-/-</sup> generates a single band  
674 around 900 bp and all heterozygous mice generate both the bands at 700 bp and 900  
675 bp (**b**).

### 676 **Supplementary Figure 3: Effect of GRA15 and GRA24 on cREL nuclear** 677 **translocation**

678 Indicated parasite strains were added (MOI of 3) to confluent monolayers of HFFs  
679 grown on coverslips in 24-well plates. 16 h p.i. cells were fixed and stained with cREL  
680 antibody. Each dot represents the mean value of at least 15 host cell nuclei from a  
681 single experiment. A representative image for each group is shown on the right. Scale  
682 bar represents 10  $\mu$ m. All the data are shown as mean  $\pm$  SEM. Statistical analysis was  
683 done by two sample Student's t test.

### 684 **Supplementary Figure 4:**

685 *Tlr11*<sup>-/-</sup> mice were i.p infected with 5,000 tachyzoites of indicated *Toxoplasma* strains  
686 and 1 day p.i. serum was collected from each of the groups to measure IL12/IL23p40  
687 (a). Survival and body weight measurements of *Tlr11*<sup>-/-</sup> mice (N=8 mice per group) that  
688 were i.p infected with 100-1000 tachyzoites (b-c) or 10 tissue cysts (d-e) of the  
689 indicated strains. *Tlr11*<sup>-/-</sup> mice were i.p injected with indicated doses of tachyzoites of  
690 different *Toxoplasma* strains derived from F1 progenies of type II X type III crosses (51)  
691 and body weight was measured daily throughout the infection (f-h). All the data are  
692 represented as mean ± SEM. Statistical analysis was done by two sample Student's t  
693 test and log rank test for survival curve.

#### 694 **Supplementary Figure 5**

695 PMA differentiated THP1 macrophages were infected with indicated strains for 24 h and  
696 immunofluorescence assay was performed to quantify nuclear translocation of the NFκB  
697 p65 subunit (a), p-p38 MAPK (b) and NFκB cREL subunit (c). Scale bar represents 10  
698 μm.

#### 699 **Supplementary Figure 6:**

700 PBMCs or HFFs were infected with indicated *Toxoplasma* strains at three different  
701 MOIs for 24 h, after which supernatants were collected to measure S100A11 in PBMCs  
702 (a) and the PBMC lysates were used to measure parasite growth (b). S100A11 was  
703 measured in HFFs (c). Caspase 1/4 activity assay was measured from HFFs as  
704 described in materials and methods (d). Each dot represents the mean value of 3  
705 technical replicates performed for each experiment. Statistical analysis was performed



706 by One way ANOVA followed by Tukey's multiple comparison test. Data are  
707 represented as mean  $\pm$  standard error of the mean (SEM).

## 708 **Acknowledgements**

709 This study was supported by the National Institutes of Health (R01-AI080621) awarded  
710 to J.P.J.S. DM was supported by the American Heart Association Post-doctoral  
711 fellowship (18POST34030036)

712

## 713 **References**

- 714 1. Sullivan WJ Jr, Jeffers V. 2012. Mechanisms of *Toxoplasma gondii* persistence and  
715 latency. *FEMS Microbiol Rev* 36:717–733.
- 716 2. Dubey JP, Lindsay DS, Speer CA. 1998. Structures of *Toxoplasma gondii*  
717 tachyzoites, bradyzoites, and sporozoites and biology and development of tissue  
718 cysts. *Clin Microbiol Rev* 11:267–299.
- 719 3. Montoya JG, Liesenfeld O. 2004. Toxoplasmosis. *Lancet* 363:1965–1976.
- 720 4. Yarovinsky F. 2005. TLR11 Activation of Dendritic Cells by a Protozoan Profilin-Like  
721 Protein. *Science* 308:1626–1629.
- 722 5. Koblansky AA, Jankovic D, Oh H, Hieny S, Sungnak W, Mathur R, Hayden MS,  
723 Akira S, Sher A, Ghosh S. 2013. Recognition of profilin by Toll-like receptor 12 is  
724 critical for host resistance to *Toxoplasma gondii*. *Immunity* 38:119–130.
- 725 6. Raetz M, Kibardin A, Sturge CR, Pifer R, Li H, Burstein E, Ozato K, Larin S,

- 726 Yarovinsky F. 2013. Cooperation of TLR12 and TLR11 in the IRF8-Dependent IL-12  
727 Response to *Toxoplasma gondii* Profilin. *The Journal of Immunology* 191:4818 LP–  
728 4827.
- 729 7. Yarovinsky F. 2014. Innate immunity to *Toxoplasma gondii* infection. *Nat Rev*  
730 *Immunol* 14:109-121.
- 731 8. Trinchieri G. 2003. Interleukin-12 and the regulation of innate resistance and  
732 adaptive immunity. *Nat Rev Immunol* 3:133–146.
- 733 9. Howard JC, Hunn JP, Steinfeldt T. 2011. The IRG protein-based resistance  
734 mechanism in mice and its relation to virulence in *Toxoplasma gondii*. *Curr Opin*  
735 *Microbiol* 14:414–421.
- 736 10. Niedelman W, Gold DA, Rosowski EE, Sprokholt JK, Lim D, Arenas AF, Melo MB,  
737 Spooner E, Yaffe MB, Saeij JPJ. 2012. The rhoptry proteins ROP18 and ROP5  
738 mediate *Toxoplasma gondii* evasion of the murine, but not the human, interferon-  
739 gamma response. *PLoS Pathog* 8:e1002784.
- 740 11. Zhao YO, Khaminets A, Hunn JP, Howard JC. 2009. Disruption of the *Toxoplasma*  
741 *gondii* parasitophorous vacuole by IFN $\gamma$ -inducible immunity-related GTPases (IRG  
742 proteins) triggers necrotic cell death. *PLoS Pathog* 5:e1000288.
- 743 12. Broz P, Dixit VM. 2016. Inflammasomes: Mechanism of assembly, regulation and  
744 signalling. *Nat Rev Immunol* 16:407–420.
- 745 13. Gorfou G, Cirelli KM, Melo MB, Mayer-Barber K, Crown D, Koller BH, Masters S,  
746 Sher A, Leppla SH, Moayeri M, Saeij JPJ, Grigg ME. 2014. Dual Role for

- 747           Inflammasome Sensors NLRP1 and NLRP3 in Murine Resistance to *Toxoplasma*  
748           *gondii*. *mBio* 5:e01117-13.
- 749   14. Cai G, Kastelein R, Hunter CA. 2000. Interleukin-18 (IL-18) enhances innate IL-12-  
750           mediated resistance to *Toxoplasma gondii*. *Infect Immun* 68:6932–6938.
- 751   15. Hunter CA, Chizzonite R, Remington JS. 1995. IL-1 beta is required for IL-12 to  
752           induce production of IFN-gamma by NK cells. A role for IL-1 beta in the T cell-  
753           independent mechanism of resistance against intracellular pathogens. *J Immunol*  
754           155:4347–4354.
- 755   16. Yarovinsky F, Hieny S, Sher A. 2008. Recognition of *Toxoplasma gondii* by TLR11  
756           prevents parasite-induced immunopathology. *J Immunol* 181:8478–8484.
- 757   17. Gazzinelli RT, Mendonça-Neto R, Lilue J, Howard J, Sher A. 2014. Innate  
758           resistance against *Toxoplasma gondii*: an evolutionary tale of mice, cats, and men.  
759           *Cell Host Microbe* 15:132–138.
- 760   18. Safronova A, Araujo A, Camanzo ET, Moon TJ, Elliott MR, Beiting DP, Yarovinsky  
761           F. 2018. Alarmin S100A11 initiates a chemokine response to the human pathogen  
762           *Toxoplasma gondii*. *Nat Immunol* 20:64-72.
- 763   19. Witola WH, Mui E, Hargrave A, Liu S, Hypolite M, Montpetit A, Cavailles P, Bisanz  
764           C, Cesbron-Delauw MF, Fournié GJ, McLeod R. 2011. NALP1 influences  
765           susceptibility to human congenital toxoplasmosis, proinflammatory cytokine  
766           response, and fate of *Toxoplasma gondii*-infected monocytic cells. *Infect Immun*  
767           79:756–766.

- 768 20. Gov L, Schneider CA, Lima TS, Pandori W, Lodoen MB. 2017. NLRP3 and  
769 Potassium Efflux Drive Rapid IL-1 $\beta$  Release from Primary Human Monocytes during  
770 *Toxoplasma gondii* Infection. *The Journal of Immunology* 199:2855 LP–2864.
- 771 21. Fisch D, Bando H, Clough B, Hornung V, Yamamoto M, Shenoy AR, Frickel E-M.  
772 2019. Human GBP1 is a microbe-specific gatekeeper of macrophage apoptosis and  
773 pyroptosis. *EMBO J* 38:e100926.
- 774 22. Hakimi M-A, Olias P, Sibley LD. 2017. *Toxoplasma* Effectors Targeting Host  
775 Signaling and Transcription. *Clin Microbiol Rev* 30:615–645.
- 776 23. Hunter CA, Sibley LD. 2012. Modulation of innate immunity by *Toxoplasma gondii*  
777 virulence effectors. *Nat Rev Microbiol* 10:766–778.
- 778 24. Lorenzi H, Khan A, Behnke MS, Namasivayam S, Swapna LS, Hadjithomas M,  
779 Karamycheva S, Pinney D, Brunk BP, Ajioka JW, Ajzenberg D, Boothroyd JC,  
780 Boyle JP, Dardé ML, Diaz-Miranda MA, Dubey JP, Fritz HM, Gennari SM, Gregory  
781 BD, Kim K, Saeij JPJJ, Su C, White MW, Zhu XQ, Howe DK, Rosenthal BM, Grigg  
782 ME, Parkinson J, Liu L, Kissinger JC, Roos DS, Sibley LD. 2016. Local admixture of  
783 amplified and diversified secreted pathogenesis determinants shapes mosaic  
784 *Toxoplasma gondii* genomes. *Nat Commun* 7:10147.
- 785 25. Saeij JPJ, Boyle JP, Boothroyd JC. 2005. Differences among the three major  
786 strains of *Toxoplasma gondii* and their specific interactions with the infected host.  
787 *Trends Parasitol* 21:476–481.
- 788 26. Ajzenberg D, Cogné N, Paris L, Bessières M, Thulliez P, Filisetti D, Pelloux H,

- 789 Marty P, Dardé M. 2002. Genotype of 86 *Toxoplasma gondii* isolates Associated with  
790 Human Congenital Toxoplasmosis, and Correlation with Clinical Findings. The  
791 Journal of Infectious Diseases 186:684-689.
- 792 27. Behnke MS, Khan A, Lauron EJ, Jimah JR, Wang Q, Tolia NH, Sibley LD. 2015.  
793 Rhoptry Proteins ROP5 and ROP18 Are Major Murine Virulence Factors in  
794 Genetically Divergent South American Strains of *Toxoplasma gondii*. PLoS Genet  
795 11:e1005434.
- 796 28. Fleckenstein MC, Reese ML, Konen-Waisman S, Boothroyd JC, Howard JC,  
797 Steinfeldt T. 2012. A *Toxoplasma gondii* pseudokinase inhibits host IRG resistance  
798 proteins. PLoS Biol 10:e1001358.
- 799 29. Steinfeldt T, Konen-Waisman S, Tong L, Pawlowski N, Lamkemeyer T, Sibley LD,  
800 Hunn JP, Howard JC. 2010. Phosphorylation of mouse immunity-related GTPase  
801 (IRG) resistance proteins is an evasion strategy for virulent *Toxoplasma gondii*.  
802 PLoS Biol 8:e1000576.
- 803 30. Alaganan A, Fentress SJ, Tang K, Wang Q, Sibley LD. 2014. *Toxoplasma* GRA7  
804 effector increases turnover of immunity-related GTPases and contributes to acute  
805 virulence in the mouse. Proc Natl Acad Sci U S A 111:1126–1131.
- 806 31. Rosowski EE, Lu D, Julien L, Rodda L, Gaiser RA, Jensen KDC, Saeij JPJ. 2011.  
807 Strain-specific activation of the NF- $\kappa$ B pathway by GRA15, a novel *Toxoplasma*  
808 *gondii* dense granule protein. J Exp Med 208:195–212.
- 809 32. Ma JS, Sasai M, Ohshima J, Lee Y, Bando H, Takeda K, Yamamoto M. 2014.

- 810 Selective and strain-specific NFAT4 activation by the *Toxoplasma gondii*  
811 polymorphic dense granule protein GRA6. J Exp Med 211:2013–2032.
- 812 33. Gov L, Karimzadeh A, Ueno N, Lodoen MB. 2013. Human innate immunity to  
813 *Toxoplasma gondii* is mediated by host caspase-1 and ASC and parasite GRA15.  
814 MBio 4:e00255-13.
- 815 34. Bougdour A, Durandau E, Brenier-Pinchart MP, Ortet P, Barakat M, Kieffer S, Curt-  
816 Varesano A, Curt-Bertini RL, Bastien O, Coute Y, Pelloux H, Hakimi MA. 2013. Host  
817 cell subversion by *Toxoplasma* GRA16, an exported dense granule protein that  
818 targets the host cell nucleus and alters gene expression. Cell Host Microbe 13:489–  
819 500.
- 820 35. Braun L, Brenier-Pinchart M-P, Yogavel M, Curt-Varesano A, Curt-Bertini R-L,  
821 Hussain T, Kieffer-Jaquinod S, Coute Y, Pelloux H, Tardieux I, Sharma A, Belrhali  
822 H, Bougdour A, Hakimi M-A. 2013. A *Toxoplasma* dense granule protein, GRA24,  
823 modulates the early immune response to infection by promoting a direct and  
824 sustained host p38 MAPK activation. J Exp Med 210:2071–2086.
- 825 36. Gay G, Braun L, Brenier-Pinchart M-P, Voltaire J, Josserand V, Bertini R-L,  
826 Varesano A, Touquet B, De Bock P-J, Coute Y, Tardieux I, Bougdour A, Hakimi M-  
827 A. 2016. *Toxoplasma gondii* TgIST co-opts host chromatin repressors dampening  
828 STAT1-dependent gene regulation and IFN- $\gamma$ -mediated host defenses. J Exp Med  
829 213:1779–1798.
- 830 37. Jensen KDC, Wang Y, Wojno EDT, Shastri AJ, Hu K, Cornel L, Boedec E, Ong Y-

- 831 C, Chien Y-H, Hunter CA, Boothroyd JC, Saeij JPJ. 2011. Toxoplasma Polymorphic  
832 Effectors Determine Macrophage Polarization and Intestinal Inflammation. *Cell Host*  
833 *Microbe* 9:472–483.
- 834 38. Murray PJ, Allen JE, Biswas SK, Fisher EA, Gilroy DW, Goerdts S, Gordon S,  
835 Hamilton JA, Ivashkiv LB, Lawrence T, Locati M, Mantovani A, Martinez FO, Mege  
836 J-L, Mosser DM, Natoli G, Saeij JP, Schultze JL, Shirey KA, Sica A, Suttles J,  
837 Udalova I, van Ginderachter JA, Vogel SN, Wynn TA. 2014. Macrophage Activation  
838 and Polarization: Nomenclature and Experimental Guidelines. *Immunity* 41:14–20.
- 839 39. Chen L, Christian DA, Kochanowsky JA, Phan AT, Clark JT, Wang S, Berry C, Oh  
840 J, Chen X, Roos DS, Beiting DP, Koshy AA, Hunter CA. 2020. The *Toxoplasma*  
841 *gondii* virulence factor ROP16 acts in cis and trans, and suppresses T cell  
842 responses. *The Journal of Experimental Medicine* 217: e20181757.
- 843 40. Butcher BA, Fox BA, Rommereim LM, Kim SG, Maurer KJ, Yarovinsky F, Herbert  
844 DR, Bzik DJ, Denkers EY. 2011. *Toxoplasma gondii* rhoptry kinase ROP16  
845 activates STAT3 and STAT6 resulting in cytokine inhibition and arginase-1-  
846 dependent growth control. *PLoS Pathog* 7:e1002236.
- 847 41. Jensen KDC, Hu K, Whitmarsh RJ, Hassan MA, Julien L, Lu D, Chen L, Hunter CA,  
848 Saeij JPJ. 2013. *Toxoplasma gondii* rhoptry 16 kinase promotes host resistance to  
849 oral infection and intestinal inflammation only in the context of the dense granule  
850 protein GRA15. *Infect Immun* 81:2156–2167.
- 851 42. Sturge CR, Benson A, Raetz M, Wilhelm CL, Mirpuri J, Vitetta ES, Yarovinsky F.

- 852 2013. TLR-independent neutrophil-derived IFN- is important for host resistance to  
853 intracellular pathogens. *Proceedings of the National Academy of Sciences*  
854 110:10711-10716.
- 855 43. López-Yglesias AH, Camanzo E, Martin AT, Araujo AM, Yarovinsky F. 2019.  
856 TLR11-independent inflammasome activation is critical for CD4+ T cell-derived IFN-  
857  $\gamma$  production and host resistance to *Toxoplasma gondii*. *PLoS Pathog* 15:e1007872.
- 858 44. Robben PM, Mordue DG, Truscott SM, Takeda K, Akira S, Sibley LD. 2004.  
859 Production of IL-12 by Macrophages Infected with *Toxoplasma gondii* Depends on  
860 the Parasite Genotype. *The Journal of Immunology* 172:3686–3694.
- 861 45. Kim L, Rio LD, Butcher BA, Mogensen TH, Paludan SR, Flavell RA, Denkers EY.  
862 2005. p38 MAPK Autophosphorylation Drives Macrophage IL-12 Production during  
863 Intracellular Infection. *The Journal of Immunology* 174:4178–4184.
- 864 46. Sanjabi S, Hoffmann A, Liou H-C, Baltimore D, Smale ST. 2000. Selective  
865 requirement for c-Rel during IL-12 P40 gene induction in macrophages.  
866 *Proceedings of the National Academy of Sciences* 97:12705–12710.
- 867 47. Reese ML, Zeiner GM, Saeij JPJ, Boothroyd JC, Boyle JP. 2011. Polymorphic  
868 family of injected pseudokinases is paramount in *Toxoplasma* virulence. *Proc Natl*  
869 *Acad Sci U S A* 108:9625–9630.
- 870 48. Saeij JPJ, Boyle JP, Coller S, Taylor S, Sibley LD, Brooke-Powell ET, Ajioka JW,  
871 Boothroyd JC. 2006. Polymorphic secreted kinases are key virulence factors in  
872 toxoplasmosis. *Science* 314:1780–1783.



- 873 49. Taylor S, Barragan A, Su C, Fux B, Fentress SJ, Tang K, Beatty WL, Hajj HE,  
874 Jerome M, Behnke MS, White M, Wootton JC, Sibley LD. 2006. A secreted serine-  
875 threonine kinase determines virulence in the eukaryotic pathogen *Toxoplasma*  
876 *gondii*. *Science* 314:1776–1780.
- 877 50. Behnke MS, Fentress SJ, Mashayekhi M, Li LX, Taylor GA, Sibley LD. 2012. The  
878 polymorphic pseudokinase ROP5 controls virulence in *Toxoplasma gondii* by  
879 regulating the active kinase ROP18. *PLoS Pathog* 8:e1002992.
- 880 51. Sibley LD, LeBlanc AJ, Pfefferkorn ER, Boothroyd JC. 1992. Generation of a  
881 restriction fragment length polymorphism linkage map for *Toxoplasma gondii*.  
882 *Genetics* 132:1003–1015.
- 883 52. Selleck EM, Orchard RC, Lassen KG, Beatty WL, Xavier RJ, Levine B, Virgin HW,  
884 Sibley LD. 2015. A Noncanonical Autophagy Pathway Restricts *Toxoplasma gondii*  
885 Growth in a Strain-Specific Manner in IFN-gamma-Activated Human Cells. *mBio*  
886 6:e01157–15.
- 887 53. Spiller KL, Wrona EA, Romero-Torres S, Pallotta I, Graney PL, Witherel CE,  
888 Panicker LM, Feldman RA, Urbanska AM, Santambrogio L, Vunjak-Novakovic G,  
889 Freytes DO. 2016. Differential gene expression in human, murine, and cell line-  
890 derived macrophages upon polarization. *Exp Cell Res* 347:1–13.
- 891 54. Pierce JW, Schoenleber R, Jesmok G, Best J, Moore SA, Collins T, Gerritsen ME.  
892 1997. Novel Inhibitors of Cytokine-induced I $\kappa$ B $\alpha$  Phosphorylation and Endothelial  
893 Cell Adhesion Molecule Expression Show Anti-inflammatory Effects in Vivo. *J Biol*

- 894 Chem 272:21096–21103.
- 895 55. Pargellis C, Tong L, Churchill L, Cirillo PF, Gilmore T, Graham AG, Grob PM,  
896 Hickey ER, Moss N, Pav S, Regan J. 2002. Inhibition of p38 MAP kinase by utilizing  
897 a novel allosteric binding site. Nat Struct Biol 9:268–272.
- 898 56. Tosh KW, Mittereder L, Bonne-Annee S, Hieny S, Nutman TB, Singer SM, Sher A,  
899 Jankovic D. 2016. The IL-12 Response of Primary Human Dendritic Cells and  
900 Monocytes to *Toxoplasma gondii* Is Stimulated by Phagocytosis of Live Parasites  
901 Rather Than Host Cell Invasion. The Journal of Immunology 196:345–356.
- 902 57. Andrade WA, Souza M do C, Ramos-Martinez E, Nagpal K, Dutra MS, Melo MB,  
903 Bartholomeu DC, Ghosh S, Golenbock DT, Gazzinelli RT. 2013. Combined action  
904 of nucleic acid-sensing Toll-like receptors and TLR11/TLR12 heterodimers imparts  
905 resistance to *Toxoplasma gondii* in mice. Cell Host Microbe 13:42–53.
- 906 58. Sturge CR, Yarovinsky F. 2014. Complex immune cell interplay in the gamma  
907 interferon response during *Toxoplasma gondii* infection. Infect Immun 82:3090–  
908 3097.
- 909 59. Mashayekhi M, Sandau MM, Dunay IR, Frickel EM, Khan A, Goldszmid RS, Sher A,  
910 Ploegh HL, Murphy TL, Sibley LD, Murphy KM. 2011. CD8 $\alpha$ + Dendritic Cells Are  
911 the Critical Source of Interleukin-12 that Controls Acute Infection by *Toxoplasma*  
912 *gondii* Tachyzoites. Immunity 35:249–259.
- 913 60. Schade B, Fischer HG. 2001. *Toxoplasma gondii* induction of interleukin-12 is  
914 associated with acute virulence in mice and depends on the host genotype. Vet

- 915 Parasitol 100:63–74.
- 916 61. Scanga CA, Aliberti J, Jankovic D, Tilloy F, Bennouna S, Denkers EY, Medzhitov R,  
917 Sher A. 2002. Cutting edge: MyD88 is required for resistance to *Toxoplasma gondii*  
918 infection and regulates parasite-induced IL-12 production by dendritic cells. *J*  
919 *Immunol* 168:5997–6001.
- 920 62. Aliberti J, Reis e Sousa C, Schito M, Hieny S, Wells T, Huffnagle GB, Sher A. 2000.  
921 CCR5 provides a signal for microbial induced production of IL-12 by CD8 $\alpha$ +  
922 dendritic cells. *Nat Immunol* 1:83–87.
- 923 63. Grumont R, Hochrein H, O’Keeffe M, Gugasyan R, White C, Caminschi I, Cook W,  
924 Gerondakis S. 2001. c-Rel regulates interleukin 12 p70 expression in CD8(+)  
925 dendritic cells by specifically inducing p35 gene transcription. *J Exp Med* 194:1021–  
926 1032.
- 927 64. Melo MB, Nguyen QP, Cordeiro C, Hassan MA, Yang N, McKell R, Rosowski EE,  
928 Julien L, Butty V, Dardé ML, Ajzenberg D, Fitzgerald K, Young LH, Saeij JPJ. 2013.  
929 Transcriptional Analysis of Murine Macrophages Infected with Different *Toxoplasma*  
930 Strains Identifies Novel Regulation of Host Signaling Pathways. *PLoS Pathog* 9:  
931 e1003779 .
- 932 65. Morgado P, Sudarshana DM, Gov L, Harker KS, Lam T, Casali P, Boyle JP, Lodoen  
933 MB. 2014. Type II *Toxoplasma gondii* induction of CD40 on infected macrophages  
934 enhances interleukin-12 responses. *Infect Immun* 82:4047–4055.
- 935 66. Song J, Wilhelm CL, Wangdi T, Maira-Litran T, Lee S-J, Raetz M, Sturge CR,

- 936 Mirpuri J, Pei J, Grishin NV, McSorley SJ, Gewirtz AT, Baumler AJ, Pier GB, Galan  
937 JE, Yarovinsky F. 2016. Absence of TLR11 in Mice Does Not Confer Susceptibility  
938 to Salmonella Typhi. *Cell* 164:827-828.
- 939 67. Johnson AM. 1984. Strain-dependent, route of challenge-dependent, murine  
940 susceptibility to toxoplasmosis. *Z Parasitenkd* 70:303–309.
- 941 68. Acosta Davila JA, Hernandez De Los Rios A. 2019. An Overview of Peripheral  
942 Blood Mononuclear Cells as a Model for Immunological Research of *Toxoplasma*  
943 *gondii* and Other Apicomplexan Parasites. *Front Cell Infect Microbiol* 9:24.
- 944 69. Autissier P, Soulas C, Burdo TH, Williams KC. 2010. Evaluation of a 12-color flow  
945 cytometry panel to study lymphocyte, monocyte, and dendritic cell subsets in  
946 humans. *Cytometry A* 77:410–419.
- 947 70. Berenson LS, Yang J, Sleckman BP, Murphy TL, Murphy KM. 2006. Selective  
948 Requirement of p38 $\alpha$  MAPK in Cytokine-Dependent, but Not Antigen Receptor-  
949 Dependent, Th1 Responses. *The Journal of Immunology* 176:4616–4621.
- 950 71. Zhao Y, Marple AH, Ferguson DJP, Bzik DJ, Yap GS. 2014. Avirulent strains of  
951 *Toxoplasma gondii* infect macrophages by active invasion from the phagosome.  
952 *Proceedings of the National Academy of Sciences* 111:6437–6442.
- 953 72. Channon JY, Seguin RM, Kasper LH. 2000. Differential Infectivity and Division of  
954 *Toxoplasma gondii* in Human Peripheral Blood Leukocytes. *Infect Immun* 68:4822–  
955 4826.
- 956 73. Gaidt MM, Ebert TS, Chauhan D, Schmidt T, Schmid-Burgk JL, Rapino F,

- 957       Robertson AAB, Cooper MA, Graf T, Hornung V. 2016. Human Monocytes Engage  
958       an Alternative Inflammasome Pathway. *Immunity* 44:833–846.
- 959   74. Mukhopadhyay D, Saeij JPJ. 2020. Assays to Evaluate Toxoplasma-Macrophage  
960       Interactions. *Methods Mol Biol* 2071:347–370.
- 961   75. Kim S-K, Karasov A, Boothroyd JC. 2007. Bradyzoite-Specific Surface Antigen  
962       SRS9 Plays a Role in Maintaining *Toxoplasma gondii* Persistence in the Brain and  
963       in Host Control of Parasite Replication in the Intestine. *Infect Immun* 75:1626 LP–  
964       1634.
- 965   76. Fox BA, Falla A, Rommereim LM, Tomita T, Gigley JP, Mercier C, Cesbron-Delauw  
966       M-F, Weiss LM, Bzik DJ. 2011. Type II *Toxoplasma gondii* KU80 knockout strains  
967       enable functional analysis of genes required for cyst development and latent  
968       infection. *Eukaryot Cell* 10:1193–1206.
- 969   77. Wang Y, Cirelli KM, Barros PDC, Sangaré LO, Butty V, Hassan MA, Pesavento P,  
970       Mete A, Saeij JPJ. 2019. Three *Toxoplasma gondii* Dense Granule Proteins Are  
971       Required for Induction of Lewis Rat Macrophage Pyroptosis. *mBio* 10:e02388–18.
- 972   78. Heaslip AT, Nishi M, Stein B, Hu K. 2011. The Motility of a Human Parasite,  
973       *Toxoplasma gondii*, Is Regulated by a Novel Lysine Methyltransferase. *PLoS*  
974       *Pathog* 7:e1002201.
- 975   79. Mukhopadhyay D, Mukherjee S, Roy S, Dalton JE, Kundu S, Sarkar A, Das NK,  
976       Kaye PM, Chatterjee M. 2015. M2 Polarization of Monocytes-Macrophages Is a  
977       Hallmark of Indian Post Kala-Azar Dermal Leishmaniasis. *PLoS Negl Trop Dis*

978 9:e0004145.

979 **Primer and sgRNA sequences (Table 1)**

| Name                    | Sequence                            |
|-------------------------|-------------------------------------|
| TGME49_200320_gRNA1_Fwd | 5' AAGTT GACAAAATCCTCCTCCCTGG G 3'  |
| TGME49_200320_gRNA1_Rev | 5' AAAAC CCAGGGAGGAGGATTTTGTC A 3'  |
| TGME49_200320_gRNA2_Fwd | 5' AAGTT GGACATAGTGCTCGAAGAAG G 3'  |
| TGME49_200320_gRNA2_Rev | 5' AAAAC CTTCTTCGAGCACTATGTCC A 3   |
| TGME49_230180_gRNA1_Fwd | 5' AAGTT GTACCAGGCTACAAATAGAGA G 3' |
| TGME49_230180_gRNA1_Rev | 5' AAAAC TCTCTATTTGTAGCCTGGTACA 3'  |
| TGME49_230180_gRNA2_Fwd | 5' AAGTTGGGACCGAAATGCCGAATCA G 3'   |
| TGME49_230180_gRNA2_Rev | 5' AAAACTGATTCGGCATTTCGGTCCC A 3    |
| HPT_Fwd                 | 5' ATGGCGTCCAAACCCATTGA 3'          |
| HPT_Rev                 | 5' TCGTTGAAGTCGTAGCAGCA 3'          |
| GRA24_Fwd               | 5' ATGCTCCAGATGGCACGATATACCG 3'     |
| GRA24_Rev               | 5' CTGTCGTCTGCTGGTGGTAGC 3'         |
| DHFR_Rev                | 5' ATAGTCCTGTCTGGGTTTCGCCAC 3'      |
| GRA15_Fwd               | 5' AACACGACGAGGCAGGAGAATTAC 3'      |
| GRA15_Rev               | 5' GACGACTGTAGCCTGAGCATCC 3'        |

|        |                                |
|--------|--------------------------------|
| Neo74  | 5' GTGGGATTAGATAAATGCCTGCTC 3' |
| 5ARMF2 | 5' AACACAGGCTCAGAAGAGAAGAGG 3' |
| 2285   | 5' TTGATGTATTCGTGTCCCACTGC 3'  |
| +3AMR  | 5' GCGGACACCTTCCATCTCTCAGTT 3' |

980

981 Nucleotides highlighted in grey are part of the *Bsa*I cloning site of pSS013 and

982 nucleotides in bold are the actual sgDNA sequence.

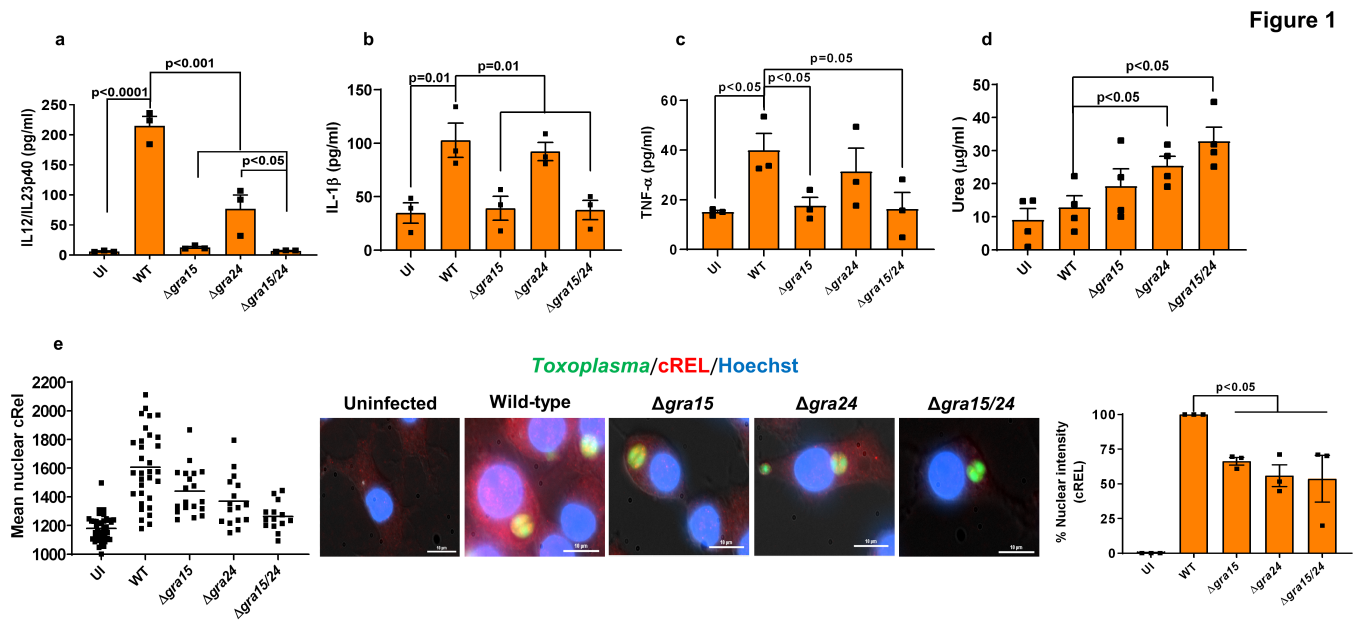

**Figure 1: GRA15 and GRA24 activate the *in vitro* macrophage response**

BMDMs were infected with indicated *Toxoplasma* strains for 24 h and IL12/IL23p40 (a), IL1 $\beta$  (b) and TNF $\alpha$  (c) were measured in the supernatant. Experiments were done 3 times. Arginase activity was measured (d) from RAW 264.7 macrophages infected with indicated strains 24 h p.i. Nuclear translocation of the cREL subunit of NF $\kappa$ B (e) was quantified from infected RAW 264.7 macrophages 18 h p.i. with indicated strains. In each experiment at least 15 cells were quantified as shown in the graph (left) and experiment was done 3 times (right panel graph). A representative image for each group is shown in the middle panel. Scale bar is 10  $\mu$ m. Each dot represents the mean of 3 technical replicates from individual experiments, except for the scatter diagram in (e). Statistical analysis was done by two sample student's t test for figures a-e. Data are represented as mean  $\pm$  standard error of the mean (SEM).



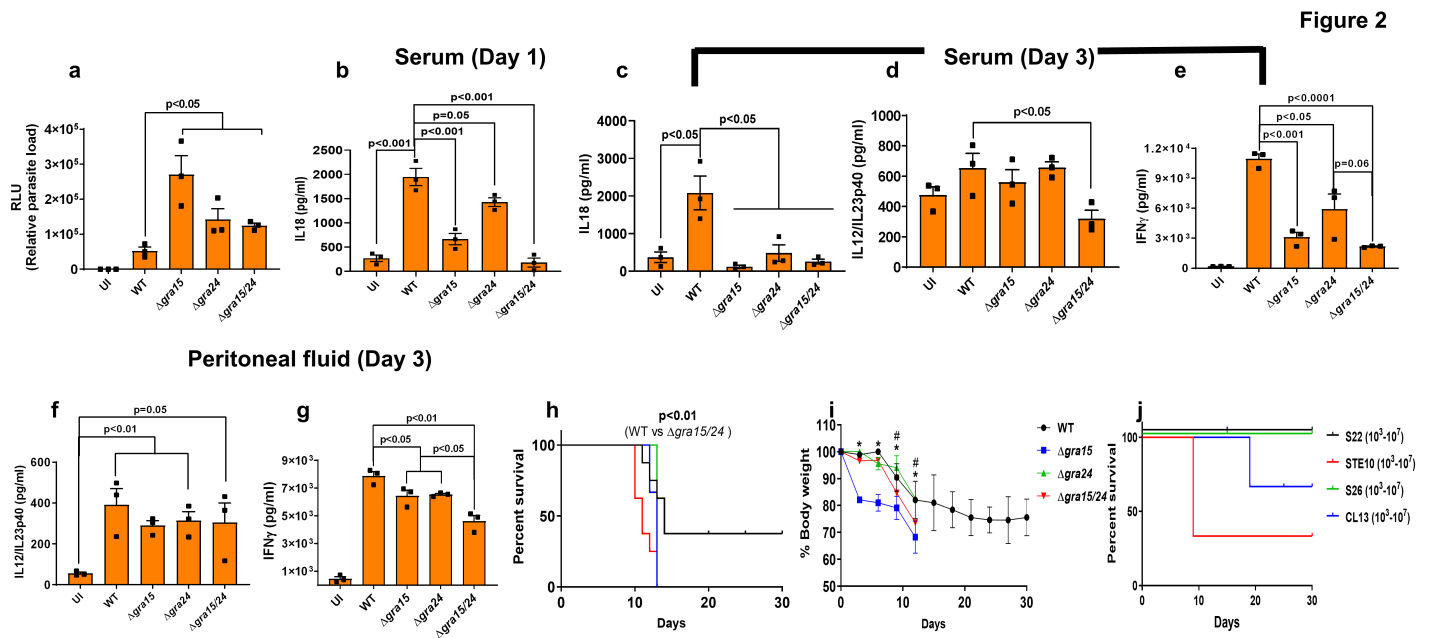

**Figure 2: Deletion of *GRA15* and *GRA24* leads to enhanced parasite virulence in *Tlr11*<sup>-/-</sup> mice**

*Tlr11*<sup>-/-</sup> mice were i.p. infected with 5,000 tachyzoites of indicated *Toxoplasma* strains expressing luciferase, and serum and peritoneal fluid were collected from each mouse (N=3 mice per group) at different time points. (a) Three days p.i. peritoneal cells were isolated, plated in tissue culture plates for 24 h and the following day luciferase reading was taken to measure the parasite burden. (b) Serum IL18 levels at 1 day p.i. Serum IL18 (c), IL12/IL23p40 (d) and IFN $\gamma$  (e) levels 3 days p.i. IL12/IL23p40 (f) and IFN $\gamma$  (g) levels in the peritoneal fluid 3 days p.i. All data represent mean  $\pm$  SEM. Statistical analysis was done with two sample Student's t tests. *Tlr11*<sup>-/-</sup> mice were s.c. infected with 5,000 tachyzoites of indicated strains and (h) survival and (i) weight (plotted as an average of the change in body weight for each cohort, where 100% body weight corresponds to the day of infection) of the mice were monitored for 30 days. Statistical analysis was done using a log-rank test. N=8 each for wild-type and  $\Delta gra15/24$  whereas N=5 for  $\Delta gra15$  and  $\Delta gra24$ . *Tlr11*<sup>-/-</sup> mice were i.p. injected with indicated doses of tachyzoites of different *Toxoplasma* strains derived from F1 progenies of a type II X type III cross [51] containing avirulent *ROP18* and *ROP5* alleles and survival was monitored (j). Each dot represents a mean of 3 technical replicates from an experiment. Statistical analysis was done by two sample student's t test for figures a-g. Data are represented as mean  $\pm$  standard error of the mean (SEM).

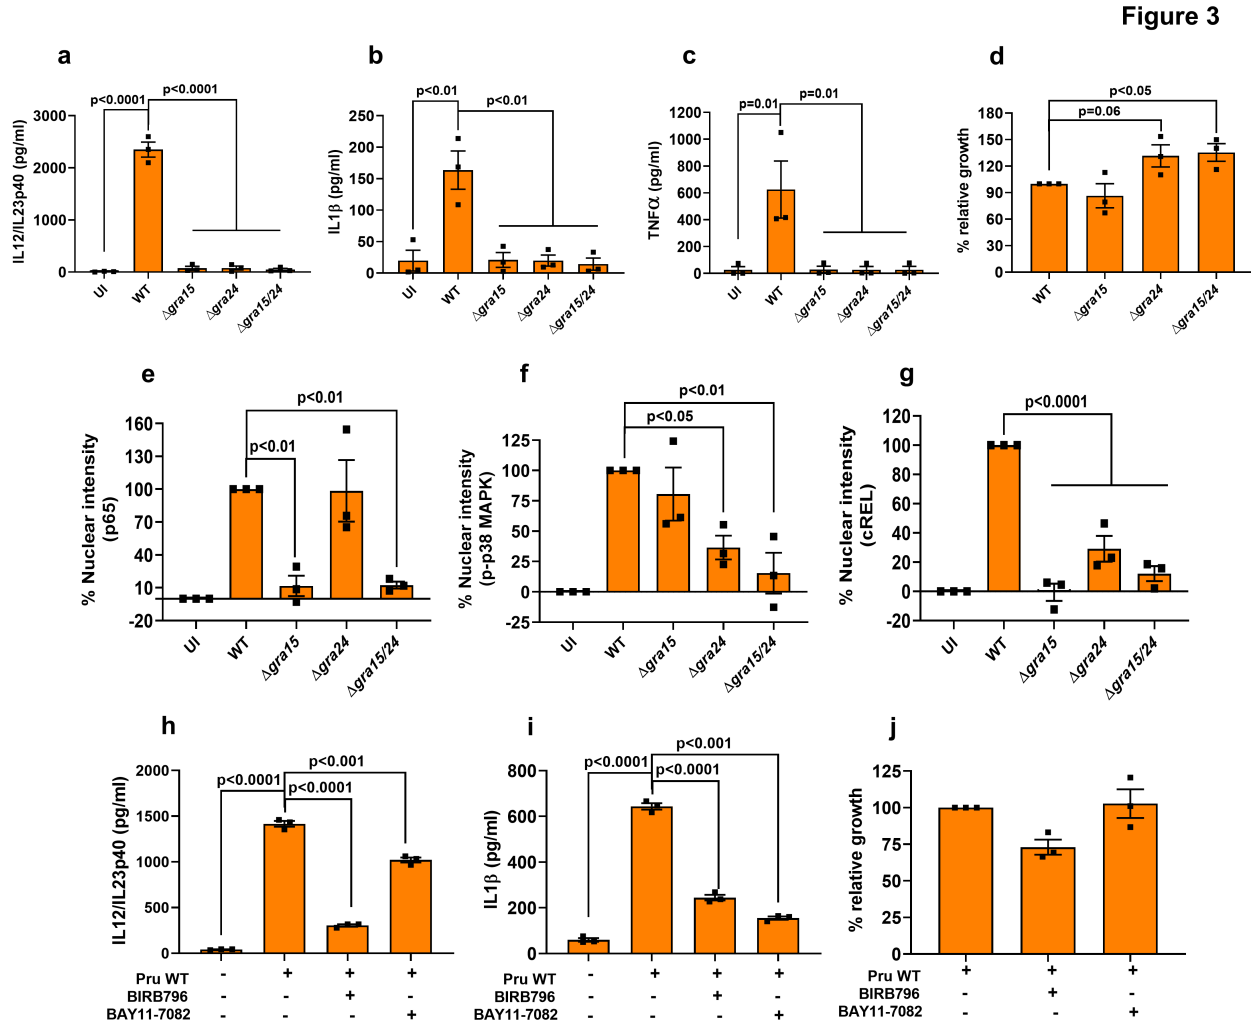

**Figure 3: GRA15 and GRA24 activate pro-inflammatory cytokine secretion by human macrophages.**

THP1 monocyte-derived macrophages were infected with indicated *Toxoplasma* strains for 24 h, after which IL12/IL23p40 (a), IL1 $\beta$  (b) and TNF $\alpha$  were measured. Relative parasite growth was measured by luciferase growth assay (d). Nuclear translocation of the NF $\kappa$ B p65 (e), p-p38 MAPK (f), and NF $\kappa$ B cREL (g) subunits were quantified from infected THP1 macrophages 18 h p.i with indicated strains. In each experiment at least 15 cells were quantified. THP1 macrophages were treated with indicated inhibitors 2 h prior to infection and subsequently infected for an additional 20 h. IL12/IL23p40 (h), IL1 $\beta$  (i) and growth (j) were measured. Each dot represents a technical mean value from a single experiment, and each experiment was done 3 times. Statistical analysis was done by One way ANOVA followed with Tukey's multiple comparison test. Data are represented as mean  $\pm$  standard error of the mean (SEM).

Figure 4

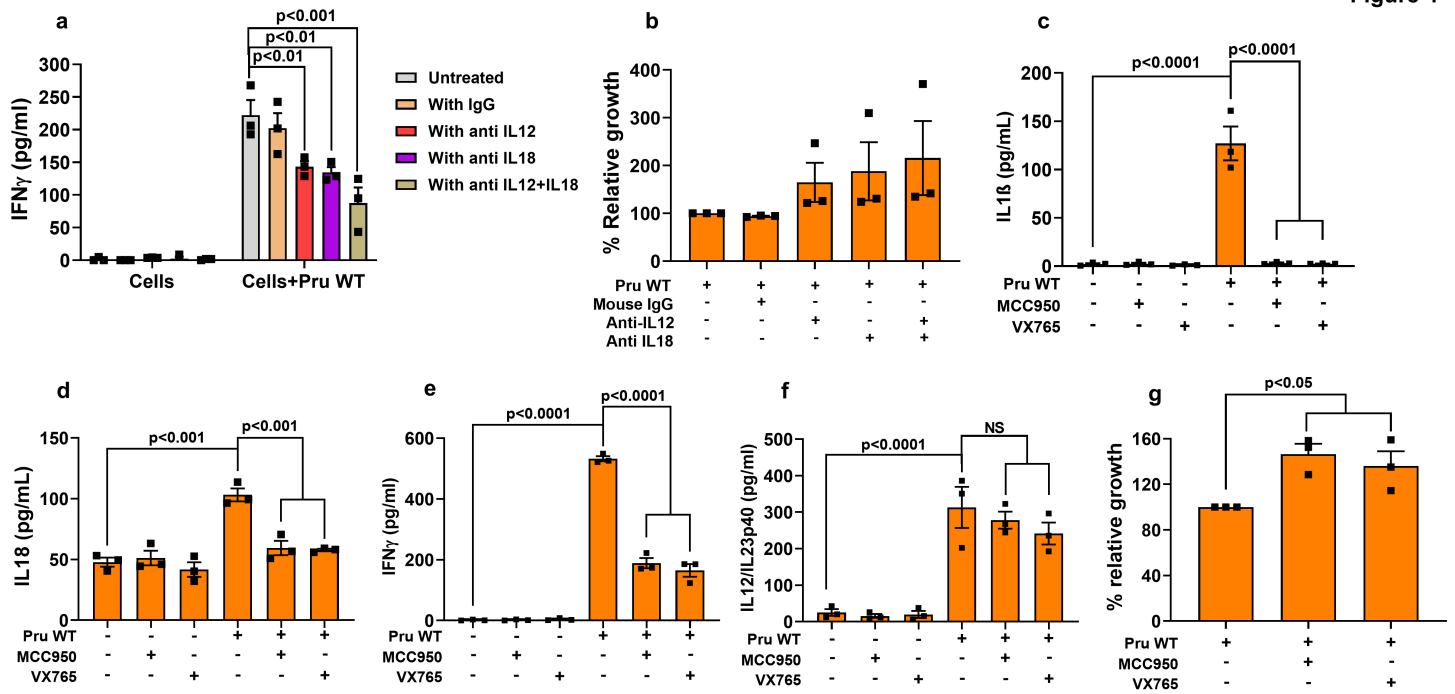

Figure 4: Secretion of IFN $\gamma$  from human PBMCs is dependent on IL12 and NLRP3 inflammasome-derived IL18 and IL1 $\beta$

PBMCs were infected with Pru wild-type parasites and treated with either anti-IL12, anti-IL18, isotype specific antibody, or anti-IL12+anti-IL18 1 h p.i. Supernatants were harvested for quantification of IFN $\gamma$  (a) and parasite growth (b). PBMCs were treated with the caspase 1/4 inhibitor VX765 or NLRP3 inhibitor MCC950 2 h pre-infection followed by infection for another 20 h. After harvesting the culture supernatant, IL1 $\beta$  (c), IL18 (d), IFN $\gamma$  (e) and IL12/IL23p40 (f) were measured. Parasite growth was measured from the cell lysate using luciferase assay (g). Each dot represents the mean of 3 technical replicates from a single experiment. Statistical analysis was done with Two way ANOVA followed by Tukey's multiple comparison test (a), two sample Student's t test (b and g), and One way ANOVA followed by Tukey's multiple comparison test (c-f). Data are represented as mean  $\pm$  standard error of the mean (SEM).

Figure 5

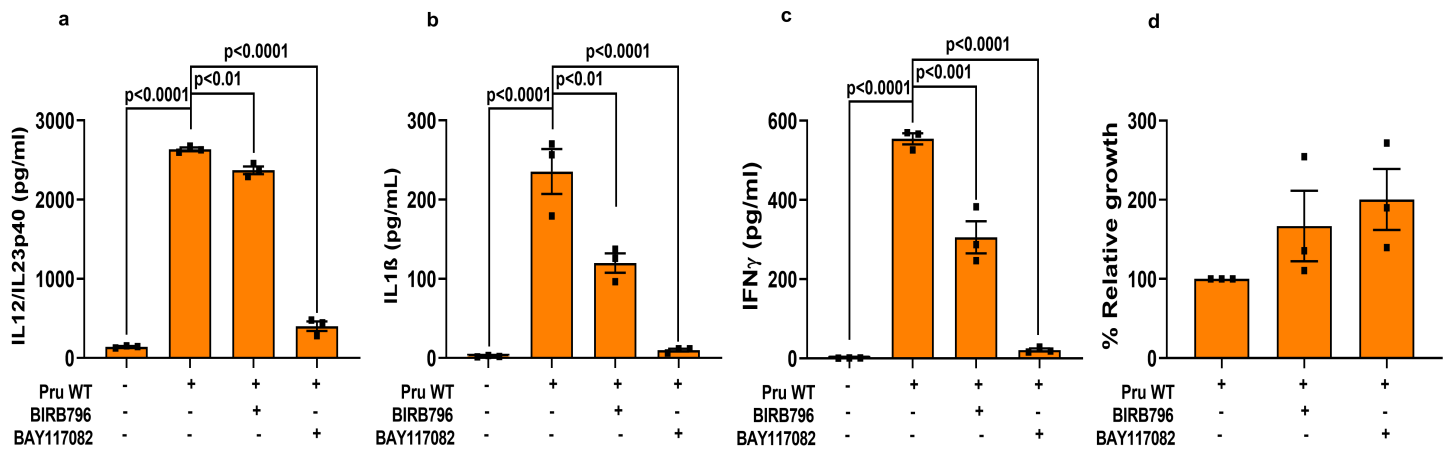

Figure 5: Cytokine secretion from human PBMCs is mediated by activation of NF $\kappa$ B and p38 MAPK

PBMCs were treated with indicated inhibitors 2 h prior to infection and subsequently infected for 20 h, after which IL12/IL23p40 (a), IL1 $\beta$  (b) and IFN $\gamma$  were measured. The relative parasite growth was measured by luciferase growth assay (d). Each dot represents the mean  $\pm$  standard error of the mean (SEM). Statistical analysis was done with One way ANOVA followed by Tukey's multiple comparison test. Data are represented as mean  $\pm$  standard error of the mean (SEM).

Figure 6

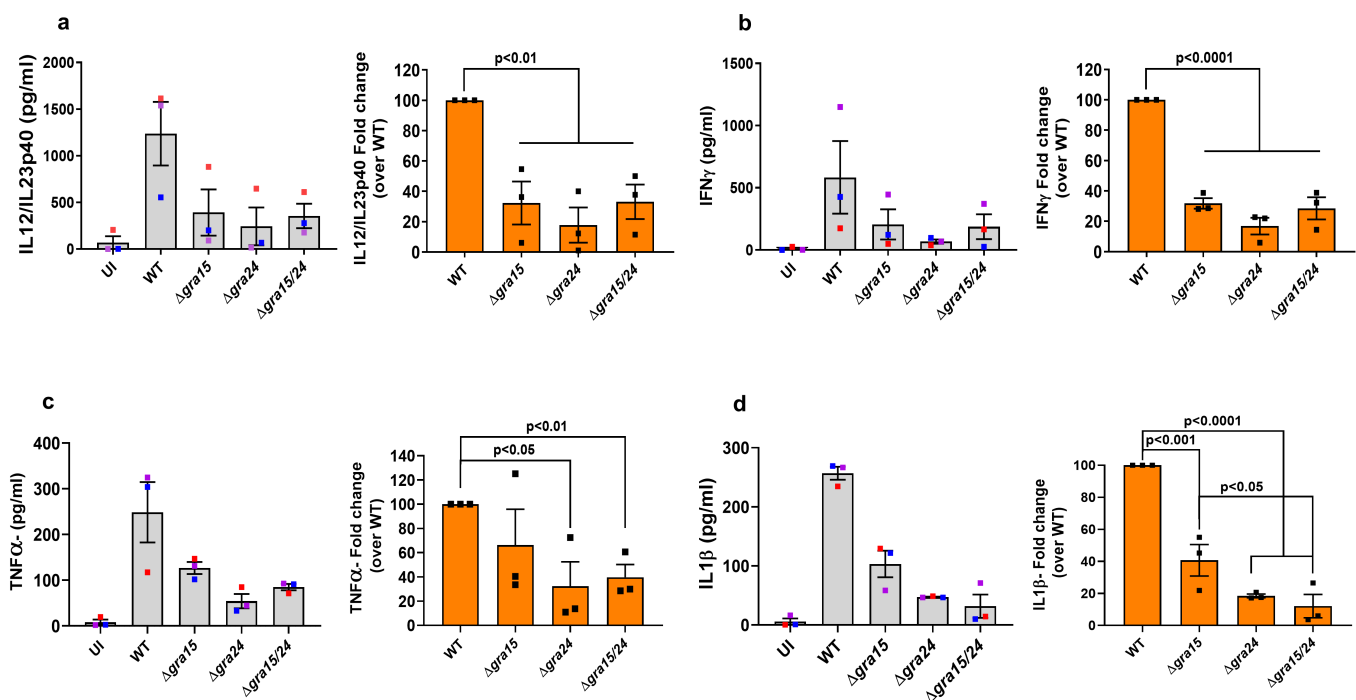

Figure 6: GRA15 and GRA24 induce cytokine secretion by human PBMCs

PBMCs were infected with indicated *Toxoplasma* strains for 24 h, after which IL12/IL23p40 (a), IFN $\gamma$  (b), TNF $\alpha$  (c), IL1 $\beta$  (d) were measured. Each dot represents the mean of 3 technical replicates from an experiment. Statistical analysis was done with One way ANOVA followed by Tukey's multiple comparison test. Data are represented as mean  $\pm$  standard error of the mean (SEM).
